# Supplementary material for: 5′-Vitamin B12 derivatives suitable for bioconjugation via the amide bond
Source: Royal Society of Chemistry journal article supplement (doi:10.1039/c7ob02898a), 2018-01-01

**Supporting Information  
for**

**5'- Vitamin B<sub>12</sub> derivatives suitable for bioconjugation  
via the amide bond**

**Agnieszka Jackowska,<sup>a</sup> Mikołaj Chromiński,<sup>a</sup> Maciej Giedyk<sup>a\*</sup> and Dorota Gryko<sup>a\*</sup>**

*<sup>a</sup>Institute of Organic Chemistry Polish Academy of Sciences, Kasprzaka 44/52, 01-224 Warsaw*

## Table of contents

|                                                                                                                                                  |    |
|--------------------------------------------------------------------------------------------------------------------------------------------------|----|
| 1. Optimization of the synthesis of amide <b>7b</b> with coupling reagent.....                                                                   | 3  |
| 2. Optimization of the synthesis of acid <b>8</b> .....                                                                                          | 3  |
| 3. Optimization of the synthesis of amide <b>11a</b> via active ester step.....                                                                  | 4  |
| 4. HPLC chromatograms.....                                                                                                                       | 4  |
| 5. <sup>1</sup> H NMR (500 MHz) and <sup>13</sup> C NMR (126 MHz) of compound <b>5</b> in CD <sub>3</sub> OD.....                                | 7  |
| 6. <sup>1</sup> H NMR (500 MHz) and <sup>13</sup> C NMR (126 MHz) of compound <b>7a</b> in CD <sub>3</sub> OD.....                               | 9  |
| 7. <sup>1</sup> H NMR (500 MHz) and <sup>13</sup> C NMR (126 MHz) of compound <b>7b</b> in CD <sub>3</sub> OD.....                               | 11 |
| 8. <sup>1</sup> H NMR (500 MHz) and <sup>13</sup> C NMR (126 MHz) of compound <b>7c</b> in CD <sub>3</sub> OD.....                               | 13 |
| 9. <sup>1</sup> H NMR (500 MHz) and <sup>13</sup> C NMR (126 MHz) of compound <b>7a</b> (in physiological conditions) in CD <sub>3</sub> OD..... | 15 |
| 10. <sup>1</sup> H NMR (500 MHz) and <sup>13</sup> C NMR (126 MHz) of compound <b>7b</b> (with coupling reagent) in CD <sub>3</sub> OD.....      | 17 |
| 11. <sup>1</sup> H NMR (500 MHz) and <sup>13</sup> C NMR (126 MHz) of compound <b>7d</b> (with coupling reagent) in CD <sub>3</sub> OD.....      | 19 |
| 12. <sup>1</sup> H NMR (500 MHz) and <sup>13</sup> C NMR (126 MHz) of compound <b>8</b> in CD <sub>3</sub> OD.....                               | 21 |
| 13. <sup>1</sup> H NMR (500 MHz) and <sup>13</sup> C NMR (126 MHz) of compound <b>11a</b> (via active ester step) in CD <sub>3</sub> OD.....     | 23 |
| 14. <sup>1</sup> H NMR (500 MHz) and <sup>13</sup> C NMR (126 MHz) of compound <b>11a</b> in CD <sub>3</sub> OD.....                             | 25 |
| 15. <sup>1</sup> H NMR (500 MHz) and <sup>13</sup> C NMR (126 MHz) of compound <b>11b</b> in CD <sub>3</sub> OD.....                             | 27 |
| 16. <sup>1</sup> H NMR (500 MHz) and <sup>13</sup> C NMR (126 MHz) of compound <b>11c</b> in CD <sub>3</sub> OD.....                             | 29 |

1. Optimization of the synthesis of amide **7b** with coupling reagent<sup>a</sup>

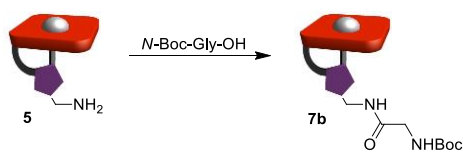

| Entry           | Coupling agent    | Solvents                               | Base              | Yield [%] <sup>b</sup> |
|-----------------|-------------------|----------------------------------------|-------------------|------------------------|
| 1               | DCC               | DMF/H <sub>2</sub> O (1:1)             | DIPEA             | 14                     |
| 2               | EDC               | DMF/H <sub>2</sub> O (1:1)             | DIPEA             | 0                      |
| 3               | HBTU, HOBt        | DMF/H <sub>2</sub> O (1:1)             | DIPEA             | 26                     |
| 4               | HBTU, HOBt        | DMSO/H <sub>2</sub> O (1:1)            | DIPEA             | 31                     |
| 5               | HBTU, HOBt        | DMF/H <sub>2</sub> O/dioxane (2:1:2)   | DIPEA             | 57                     |
| 6               | HBTU, HOBt        | DMSO/H <sub>2</sub> O/dioxane (2:1:2)  | DIPEA             | 70                     |
| 7               | HBTU, HOBt        | DMF/H <sub>2</sub> O/DMSO (2:1:2)      | DIPEA             | 82                     |
| <b>8</b>        | <b>HBTU, HOBt</b> | <b>DMF/H<sub>2</sub>O/DMSO (2:1:2)</b> | <b>DMAP</b>       | <b>85</b>              |
| 9               | HBTU, HOBt        | DMF/H <sub>2</sub> O/DMSO (2:1:2)      | Et <sub>3</sub> N | 70                     |
| 10 <sup>c</sup> | HBTU, HOBt        | DMF/H <sub>2</sub> O/DMSO (2:1:2)      | DMAP              | 88                     |

<sup>a</sup>General conditions: amine **5** (15 mg, 10 μmol), *N*-Boc-Gly-OH (9 mg, 51 μmol), DCC (11 mg, 51 μmol), EDC (10 mg, 51 μmol), HBTU (19 mg, 51 μmol), HOBt (7 mg, 51 μmol), DIPEA (9 μL, 51 μmol), DMAP (6 mg, 51 μmol), Et<sub>3</sub>N (7 μL, 51 μmol), total volume of solvents was 1.5 mL (v/v/v), r.t., 4 h; <sup>b</sup>Isolated yield; <sup>c</sup>Reaction performed with 102 μmol of *N*-Boc-Gly-OH, HBTU, HOBt and DMAP.

2. Optimization of the synthesis of acid **8**<sup>a</sup>

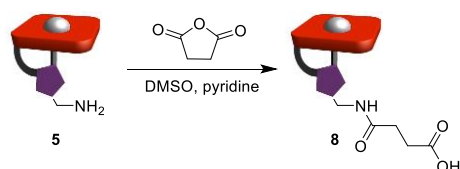

| Entry    | Succinic anhydride [equiv.] | Pyridine [equiv.] | Temperature [°C] | Time [h] | Yield [%] <sup>b</sup> |
|----------|-----------------------------|-------------------|------------------|----------|------------------------|
| 1        | 5                           | 5                 | r.t.             | 5        | 67                     |
| 2        | 5                           | 5                 | r.t.             | 17       | 91                     |
| 3        | 10                          | 10                | r.t.             | 5        | 87                     |
| 4        | 10                          | 10                | r.t.             | 17       | 96                     |
| 5        | 5                           | 5                 | 40               | 5        | 81                     |
| 6        | 5                           | 5                 | 40               | 17       | 96                     |
| <b>7</b> | <b>10</b>                   | <b>10</b>         | <b>40</b>        | <b>5</b> | <b>96</b>              |
| 8        | 10                          | 10                | 40               | 17       | 96                     |

<sup>a</sup>General conditions: amine **5** (5 mg, 3 μmol), DMSO (5 mL); <sup>b</sup>Yield estimated based on HPLC analysis.

### 3. Optimization of the synthesis of amide **11a** via active ester step<sup>a</sup>

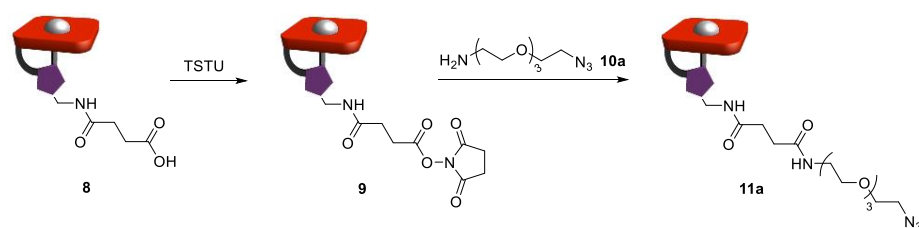

| Entry          | TSTU [equiv.] | DIPEA [equiv.] | Solvents                                      | Yield [%] <sup>b</sup> |
|----------------|---------------|----------------|-----------------------------------------------|------------------------|
| 1              | 2.0           | 2.0            | DMF/H <sub>2</sub> O/dioxane (2:1:2)          | 16                     |
| 2              | 4.0           | 4.0            | DMF/H <sub>2</sub> O/dioxane (2:1:2)          | 30                     |
| <b>3</b>       | <b>8.0</b>    | <b>8.0</b>     | <b>DMF/H<sub>2</sub>O/dioxane (2:1:2)</b>     | <b>54</b>              |
| 4              | 20.0          | 20.0           | DMF/H <sub>2</sub> O/dioxane (2:1:2)          | traces                 |
| 5              | 8.0           | 8.0            | DMF/H <sub>2</sub> O (2:1)                    | 43                     |
| 6              | 8.0           | 8.0            | DMF/0.1 M NaHCO <sub>3</sub> /dioxane (2:1:2) | 15                     |
| 7 <sup>c</sup> | 8.0           | 8.0            | DMF/0.1 M NaHCO <sub>3</sub> /dioxane (2:1:2) | 9                      |
| 8              | 8.0           | 8.0            | MeCN/H <sub>2</sub> O/dioxane (2:1:2)         | 41                     |
| 9              | 8.0           | 8.0            | NMP/H <sub>2</sub> O/dioxane (2:1:2)          | 22                     |

<sup>a</sup>General conditions: acid **8** (15 mg, 10 μmol), total volume of solvents was 1.5 mL (v/v/v), r.t., 20 h, amine **10a** (4.0 μL, 20 μmol), r.t., 75 min; <sup>b</sup>Isolated yield; <sup>c</sup>Without DIPEA.

### 4. HPLC chromatograms

#### HPLC Method

| Time [min] | H <sub>2</sub> O + 0.5% TFA [%] | MeCN [%] | λ [nm] |
|------------|---------------------------------|----------|--------|
| Initial    | 90                              | 10       | 361    |
| 15         | 30                              | 70       |        |

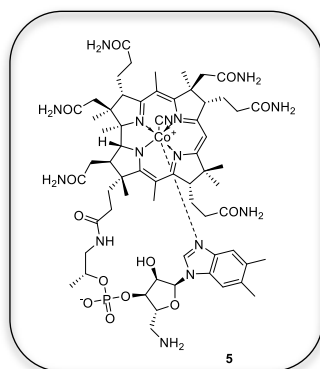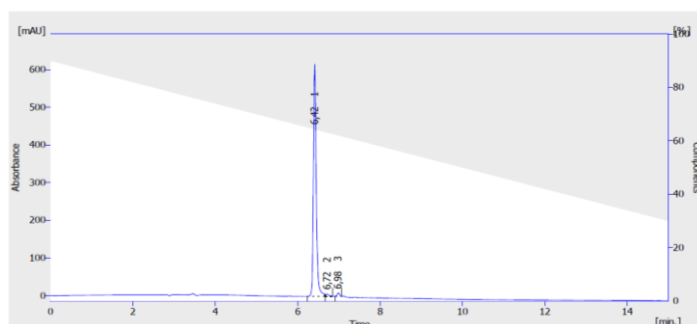

|       | Reten. Time [min] | Area [mAU.s] | Height [mAU] | Area [%] | Height [%] | W05 [min] | PDA Peak Purity |
|-------|-------------------|--------------|--------------|----------|------------|-----------|-----------------|
| 1     | 6.417             | 2931,116     | 615,739      | 97.5     | 97.6       | 0.06      | 748             |
| 2     | 6.717             | 37,950       | 6,176        | 1.3      | 1.0        | 0.10      | 980             |
| 3     | 6.983             | 35,703       | 9,028        | 1.2      | 1.4        | 0.06      | 994             |
| Total |                   | 3004,769     | 630,943      | 100.0    | 100.0      |           |                 |

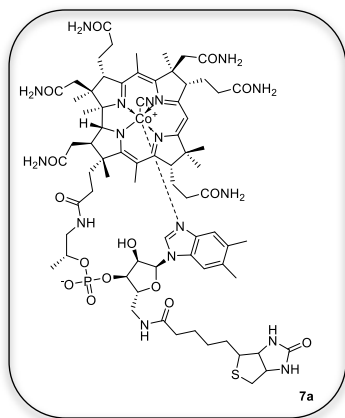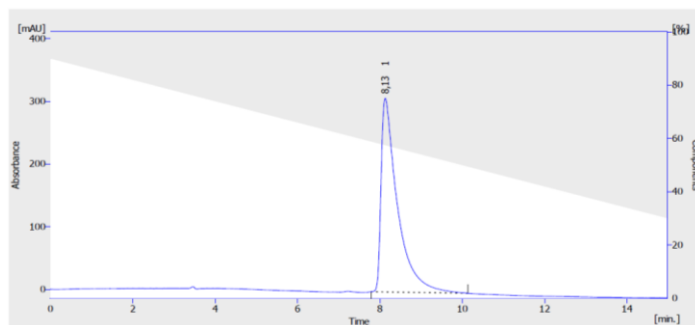

|   | Reten. Time<br>[min] | Area<br>[mAU.s] | Height<br>[mAU] | Area<br>[%] | Height<br>[%] | W05<br>[min] | PDA Peak<br>Purity |
|---|----------------------|-----------------|-----------------|-------------|---------------|--------------|--------------------|
| 1 | 8,133                | 8531,444        | 309,029         | 100,0       | 100,0         | 0,38         | 628                |
|   | Total                | 8531,444        | 309,029         | 100,0       | 100,0         |              |                    |

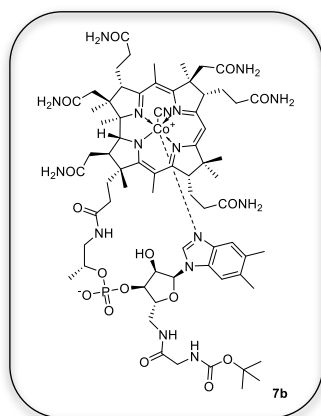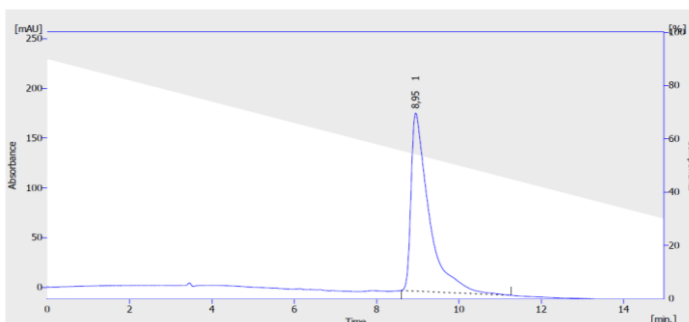

|   | Reten. Time<br>[min] | Area<br>[mAU.s] | Height<br>[mAU] | Area<br>[%] | Height<br>[%] | W05<br>[min] | PDA Peak<br>Purity |
|---|----------------------|-----------------|-----------------|-------------|---------------|--------------|--------------------|
| 1 | 8,990                | 5427,793        | 179,252         | 100,0       | 100,0         | 0,43         | 702                |
|   | Total                | 5427,793        | 179,252         | 100,0       | 100,0         |              |                    |

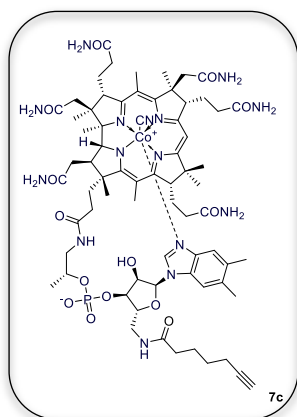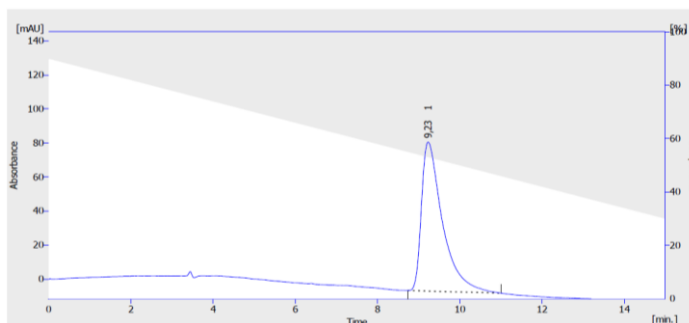

|   | Reten. Time<br>[min] | Area<br>[mAU.s] | Height<br>[mAU] | Area<br>[%] | Height<br>[%] | W05<br>[min] | PDA Peak<br>Purity |
|---|----------------------|-----------------|-----------------|-------------|---------------|--------------|--------------------|
| 1 | 9,233                | 3110,164        | 87,543          | 100,0       | 100,0         | 0,53         | 709                |
|   | Total                | 3110,164        | 87,543          | 100,0       | 100,0         |              |                    |

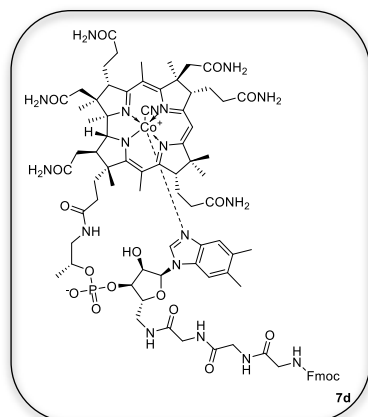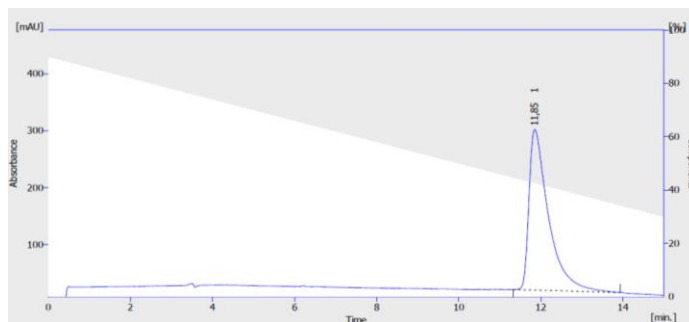

|   | Reten. Time<br>[min] | Area<br>[mAU.s] | Height<br>[mAU] | Area<br>[%] | Height<br>[%] | W05<br>[min] | PDA Peak<br>Purity |
|---|----------------------|-----------------|-----------------|-------------|---------------|--------------|--------------------|
| 1 | 11,850               | 9307,431        | 281,781         | 100,0       | 100,0         | 0,48         | 55                 |
|   | Total                | 9307,431        | 281,781         | 100,0       | 100,0         |              |                    |

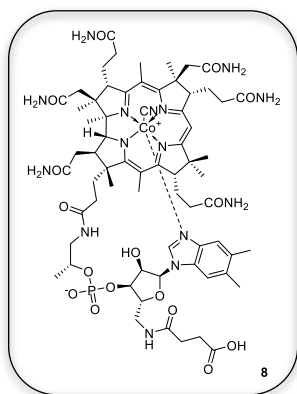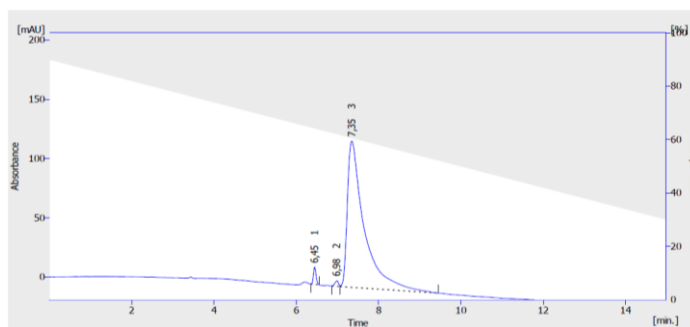

|       | Reten. Time [min] | Area [mAU.s] | Height [mAU] | Area [%] | Height [%] | WOS [min] | PDA Peak Purity |
|-------|-------------------|--------------|--------------|----------|------------|-----------|-----------------|
| 1     | 6.450             | 64,509       | 14,586       | 1.8      | 10.2       | 0.08      | 929             |
| 2     | 6.983             | 27,948       | 4,718        | 0.8      | 3.3        | 0.12      | 974             |
| 3     | 7.350             | 3505,415     | 123,476      | 97.4     | 86.5       | 0.38      | 744             |
| Total |                   | 3597,772     | 142,779      | 100.0    | 100.0      |           |                 |

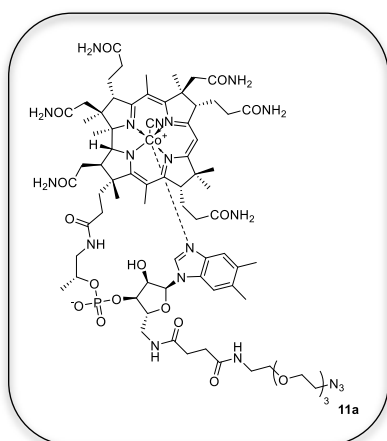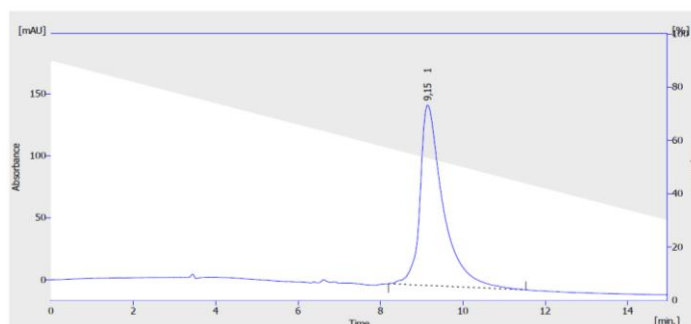

|       | Reten. Time [min] | Area [mAU.s] | Height [mAU] | Area [%] | Height [%] | WOS [min] | PDA Peak Purity |
|-------|-------------------|--------------|--------------|----------|------------|-----------|-----------------|
| 1     | 9.150             | 5667,932     | 145,556      | 100.0    | 100.0      | 0.53      | 688             |
| Total |                   | 5667,932     | 145,556      | 100.0    | 100.0      |           |                 |

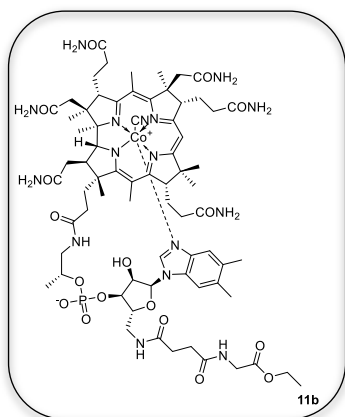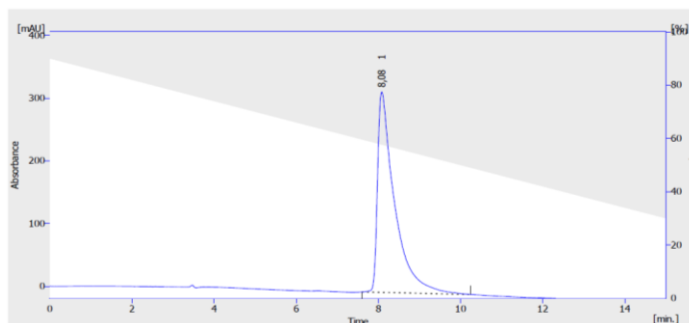

|       | Reten. Time [min] | Area [mAU.s] | Height [mAU] | Area [%] | Height [%] | WOS [min] | PDA Peak Purity |
|-------|-------------------|--------------|--------------|----------|------------|-----------|-----------------|
| 1     | 8.083             | 9207,680     | 319,976      | 100.0    | 100.0      | 0.40      | 639             |
| Total |                   | 9207,680     | 319,976      | 100.0    | 100.0      |           |                 |

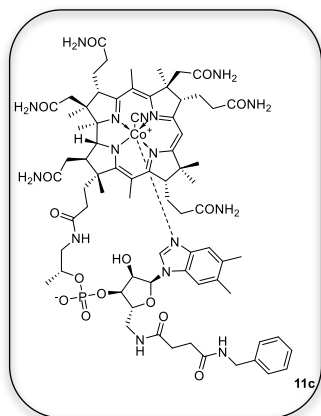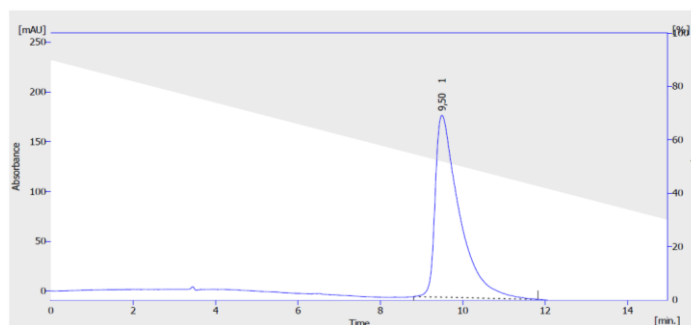

|       | Reten. Time [min] | Area [mAU.s] | Height [mAU] | Area [%] | Height [%] | WOS [min] | PDA Peak Purity |
|-------|-------------------|--------------|--------------|----------|------------|-----------|-----------------|
| 1     | 9.500             | 7414,466     | 182,862      | 100.0    | 100.0      | 0.58      | 680             |
| Total |                   | 7414,466     | 182,862      | 100.0    | 100.0      |           |                 |

5. <sup>1</sup>H NMR (500 MHz) and <sup>13</sup>C NMR (126 MHz) of compound **5** in CD<sub>3</sub>OD (for clarity only well isolated signals are integrated)

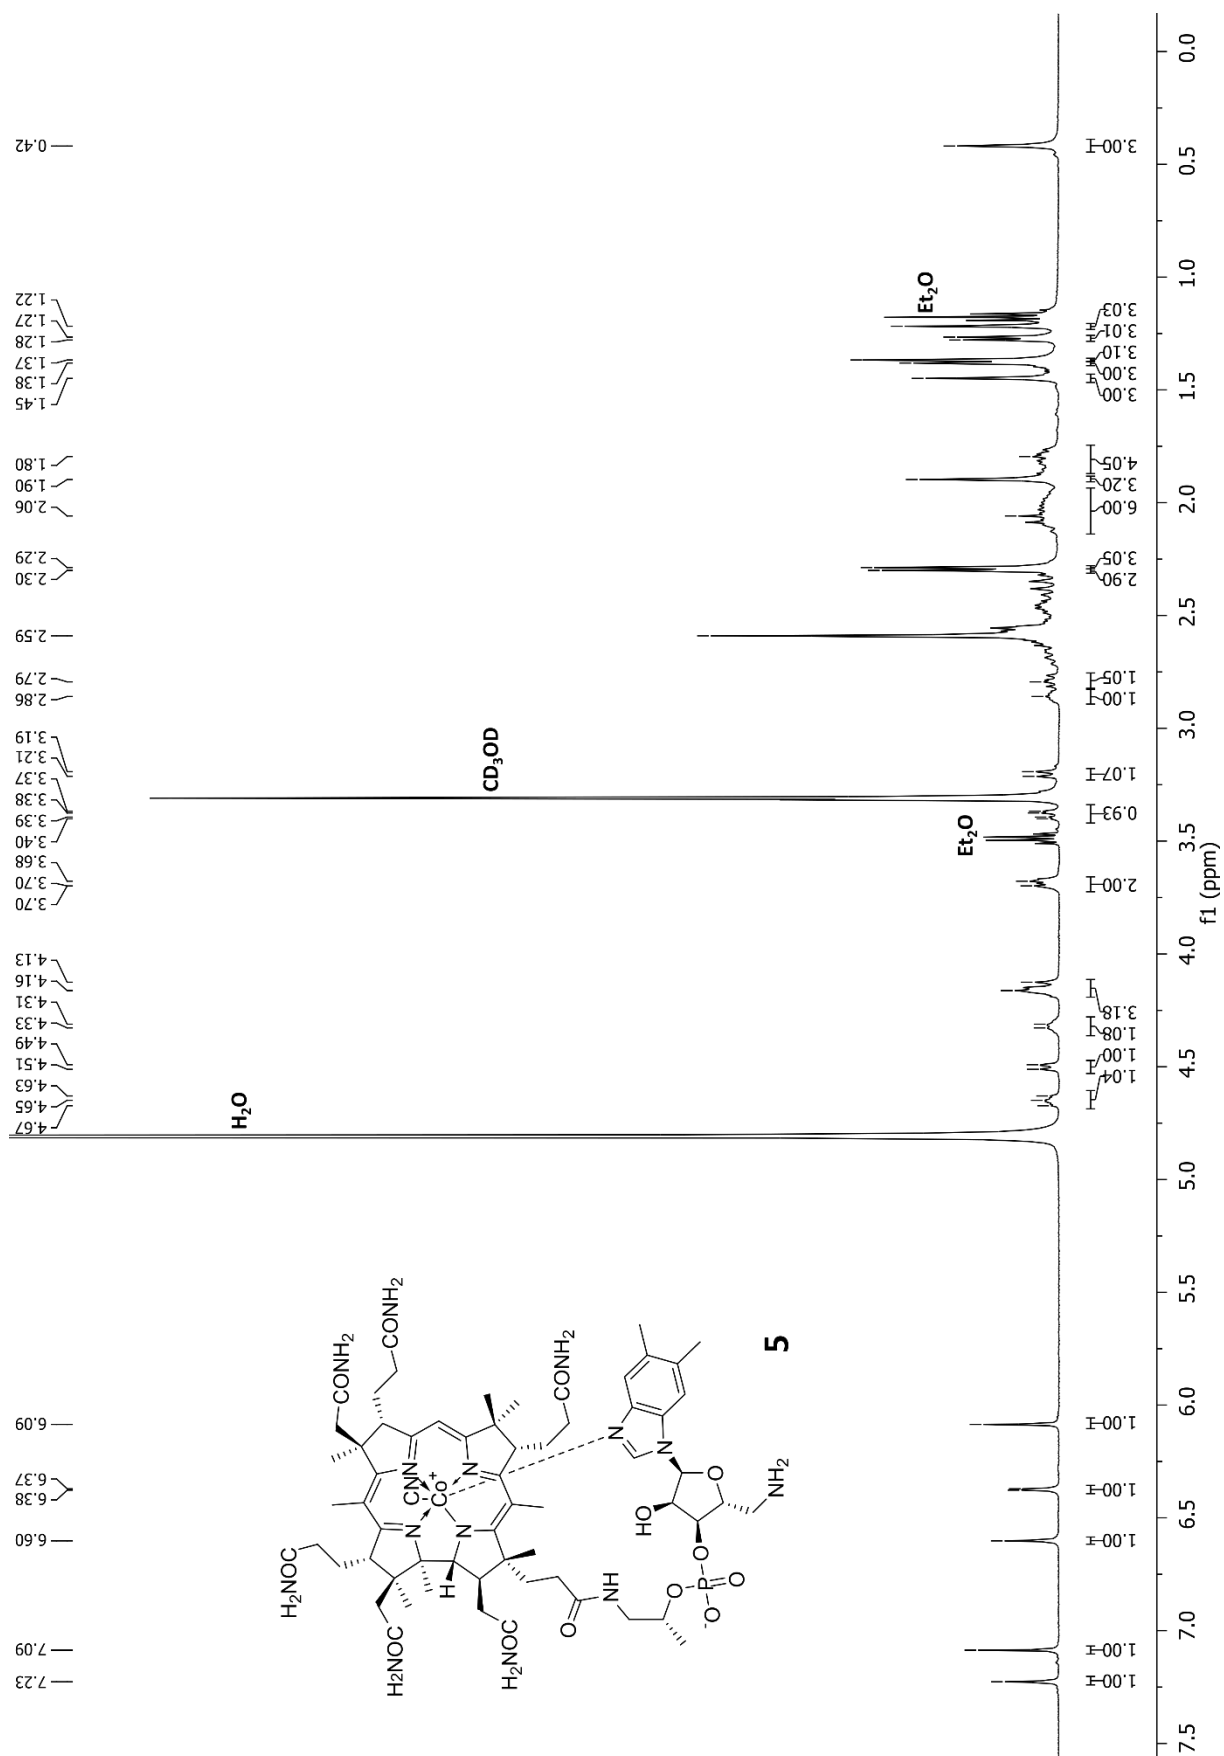

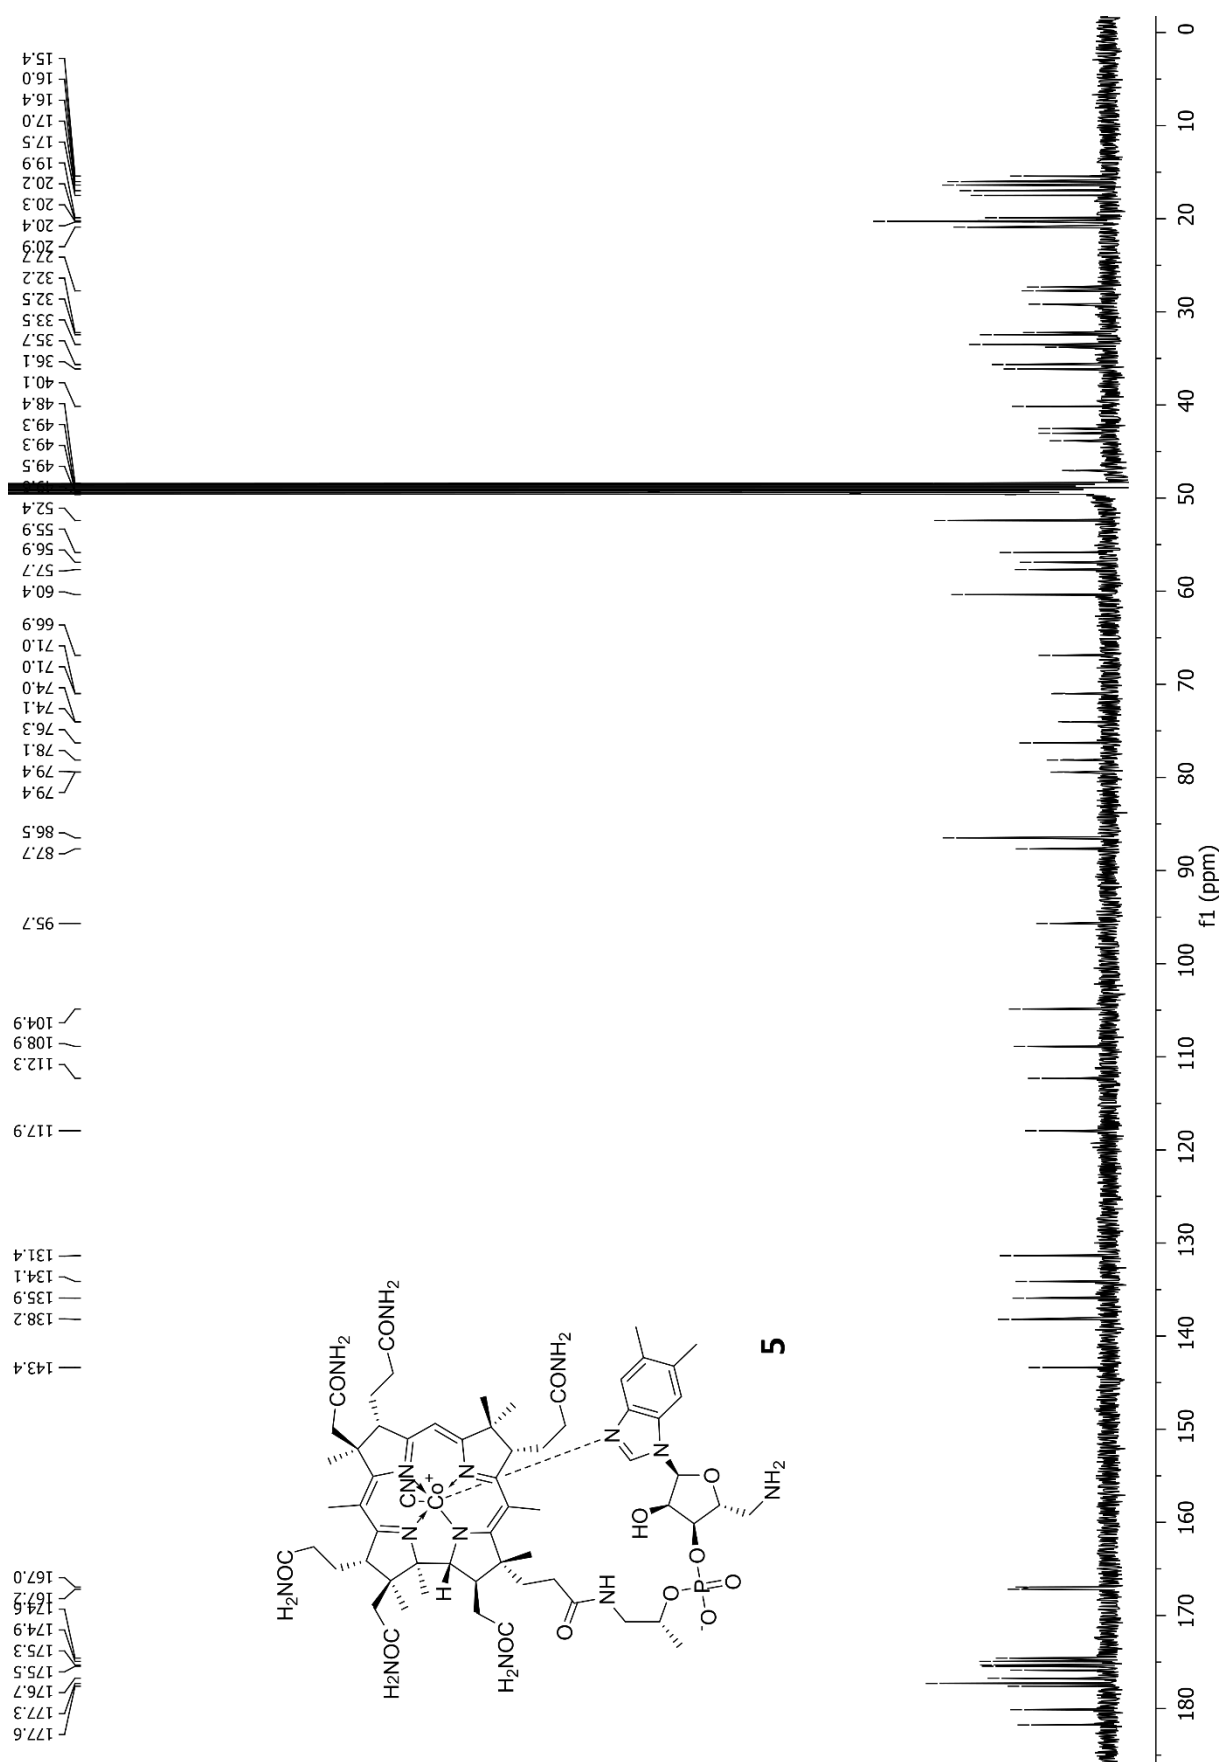



6.  $^1\text{H}$  NMR (500 MHz) and  $^{13}\text{C}$  NMR (126 MHz) of compound **7a** in  $\text{CD}_3\text{OD}$  (for clarity only well isolated signals are integrated)

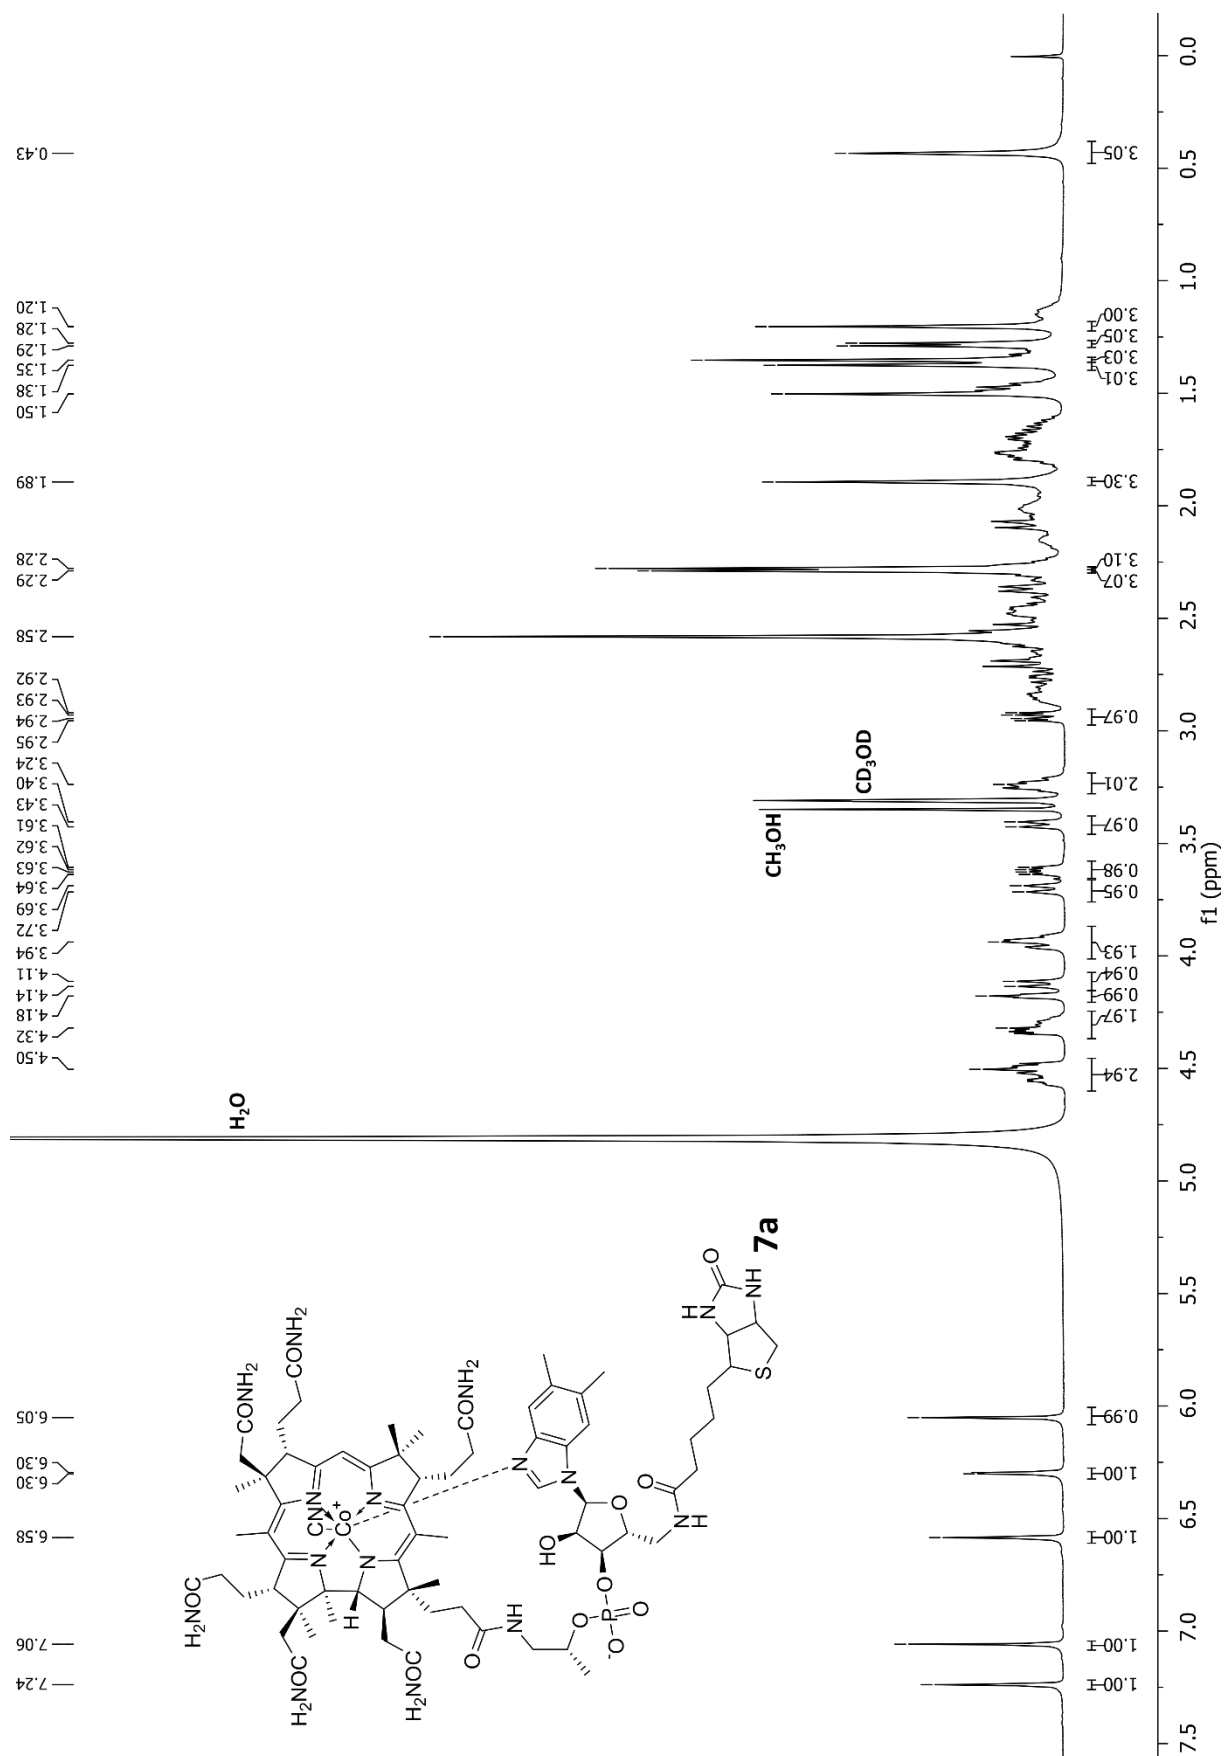

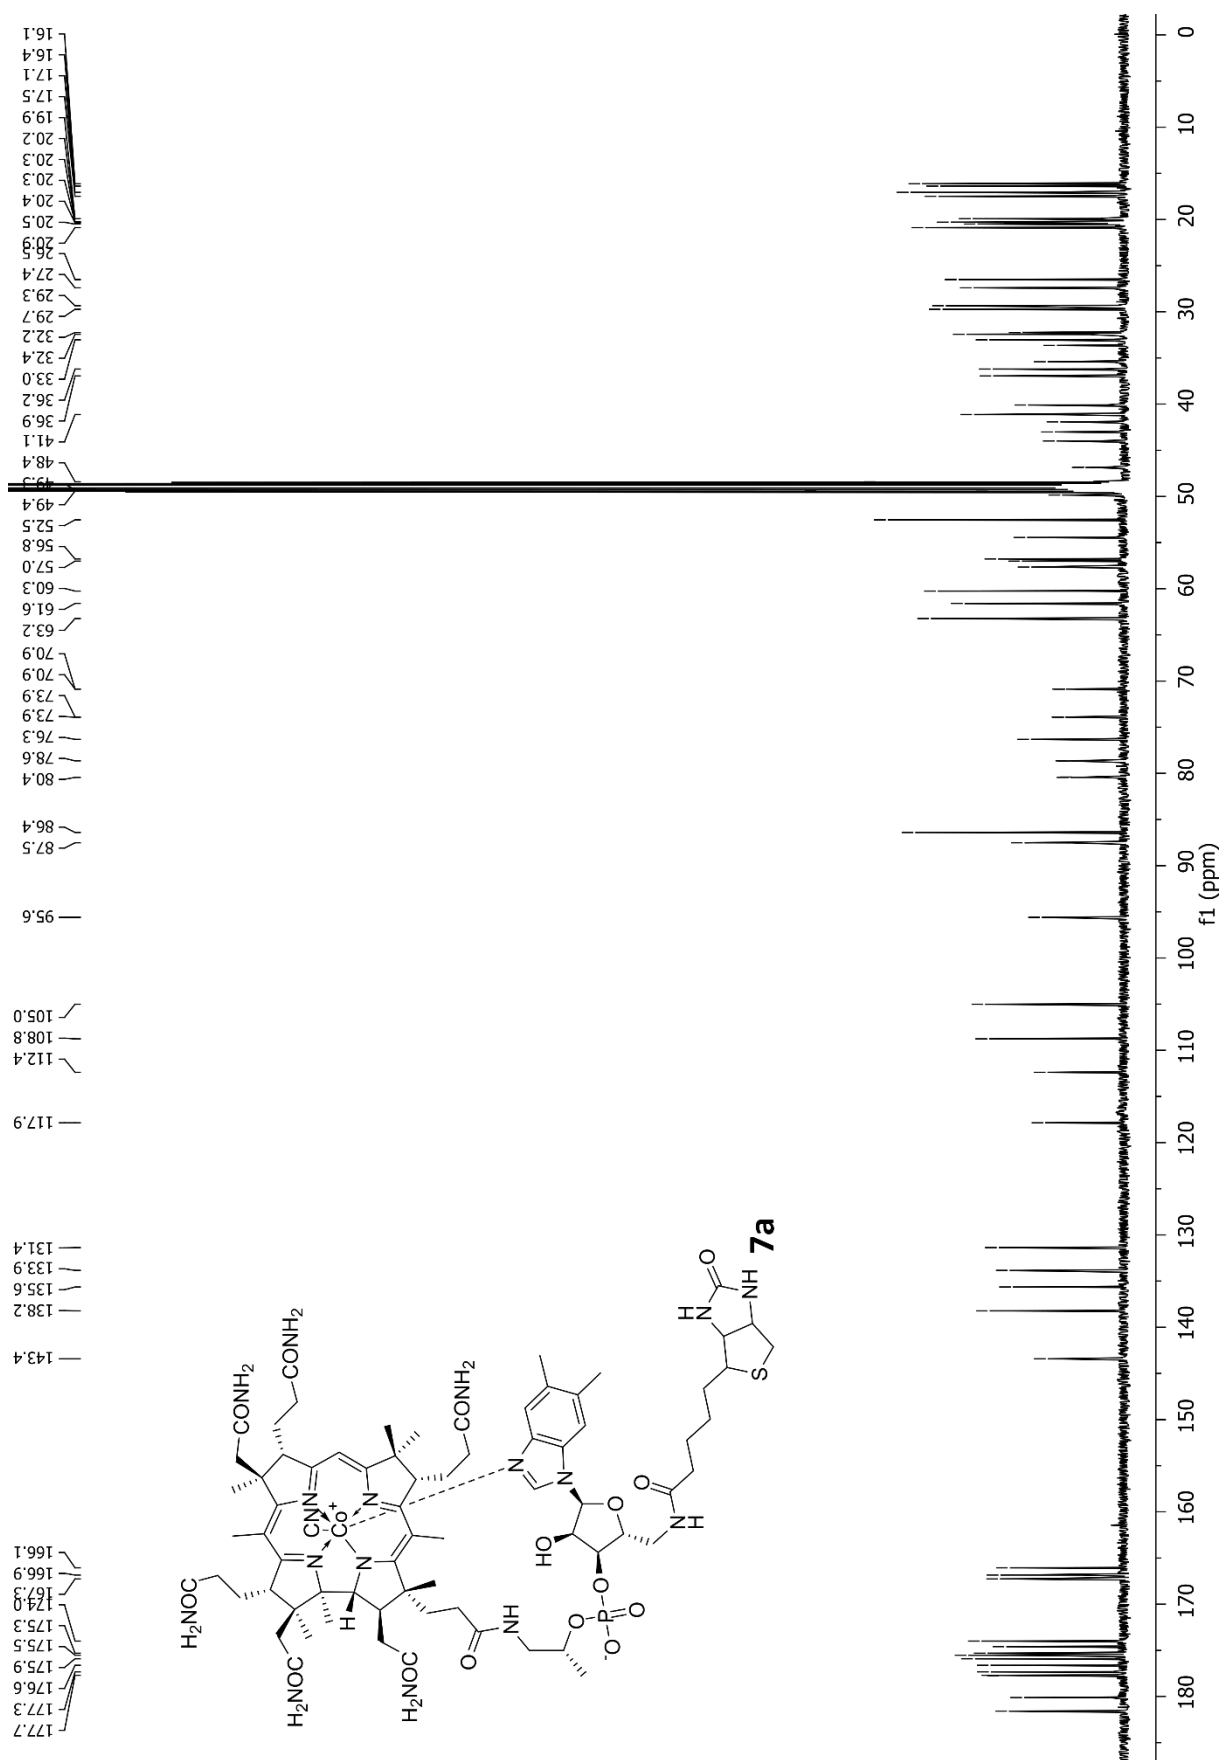

7.  $^1\text{H}$  NMR (500 MHz) and  $^{13}\text{C}$  NMR (126 MHz) of compound **7b** in  $\text{CD}_3\text{OD}$  (for clarity only well isolated signals are integrated)

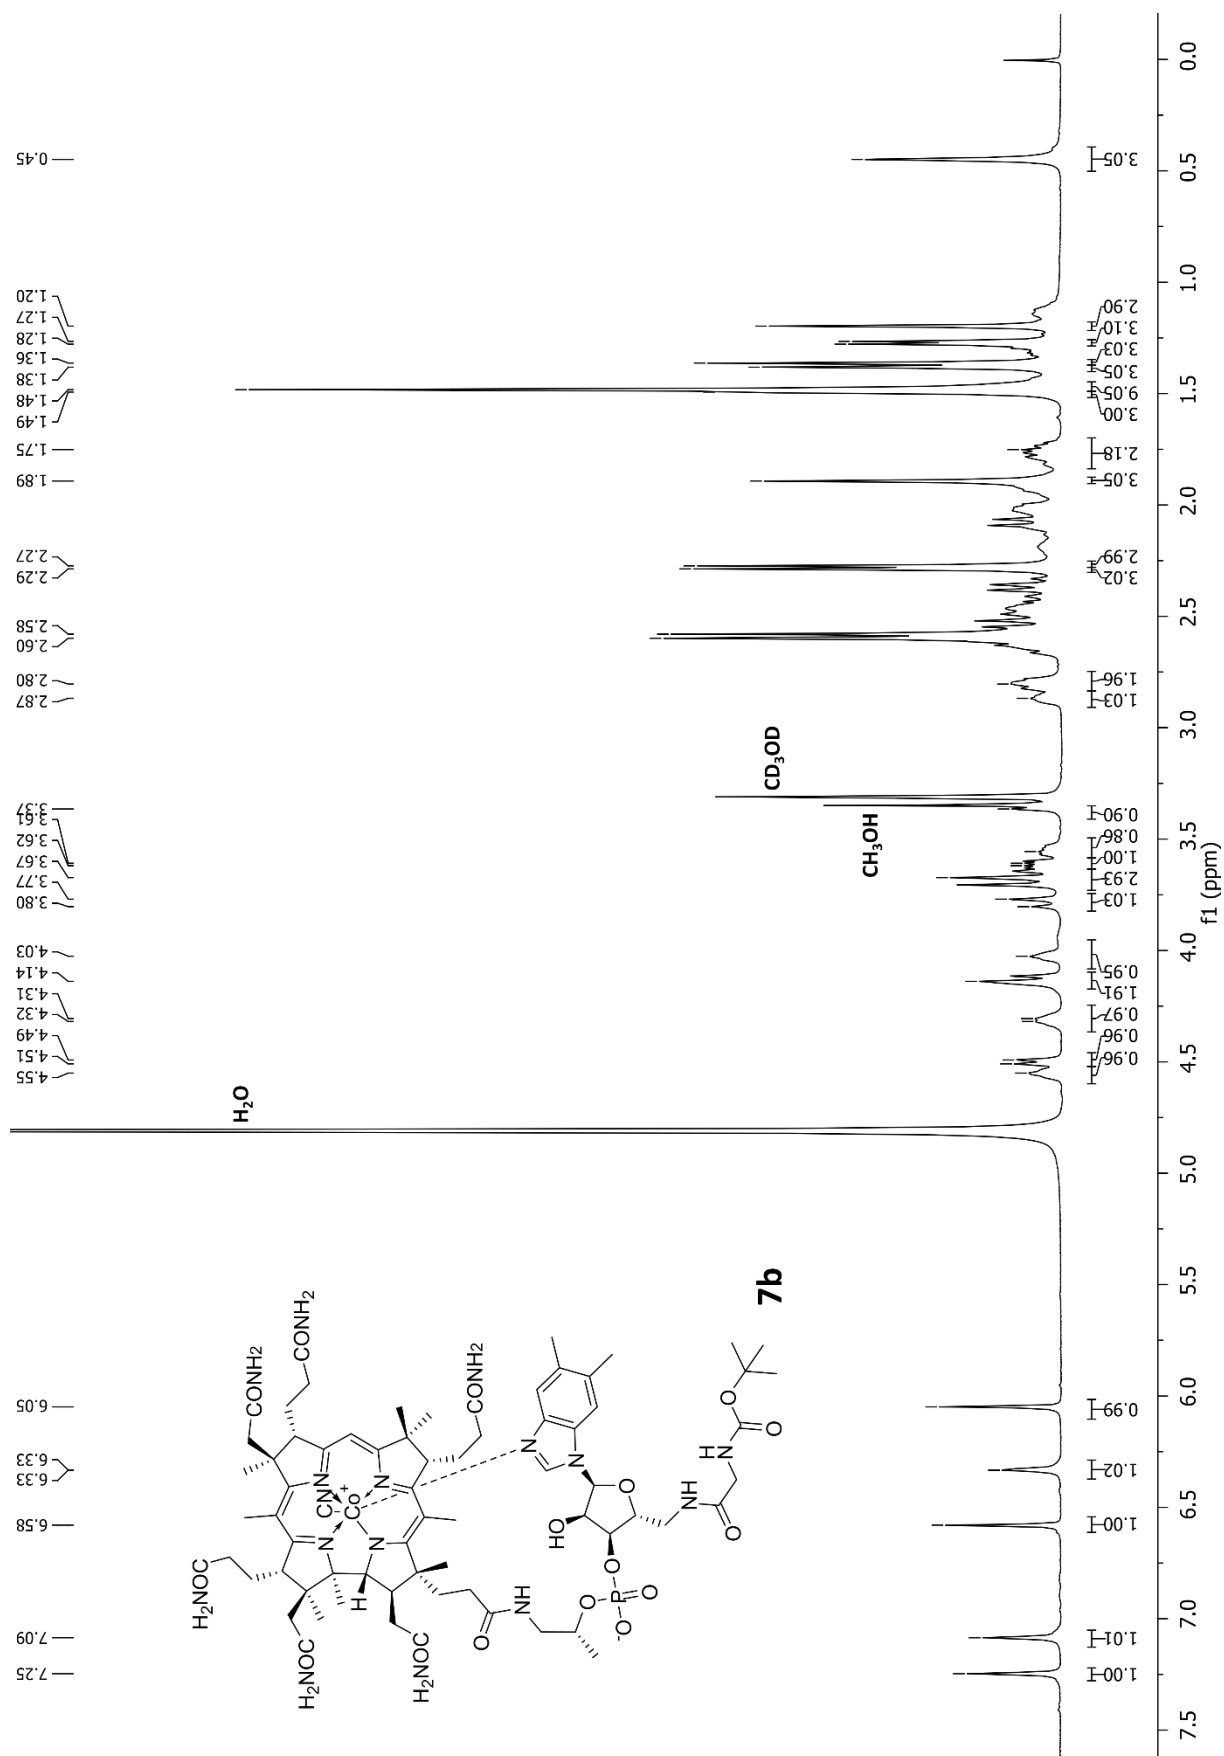

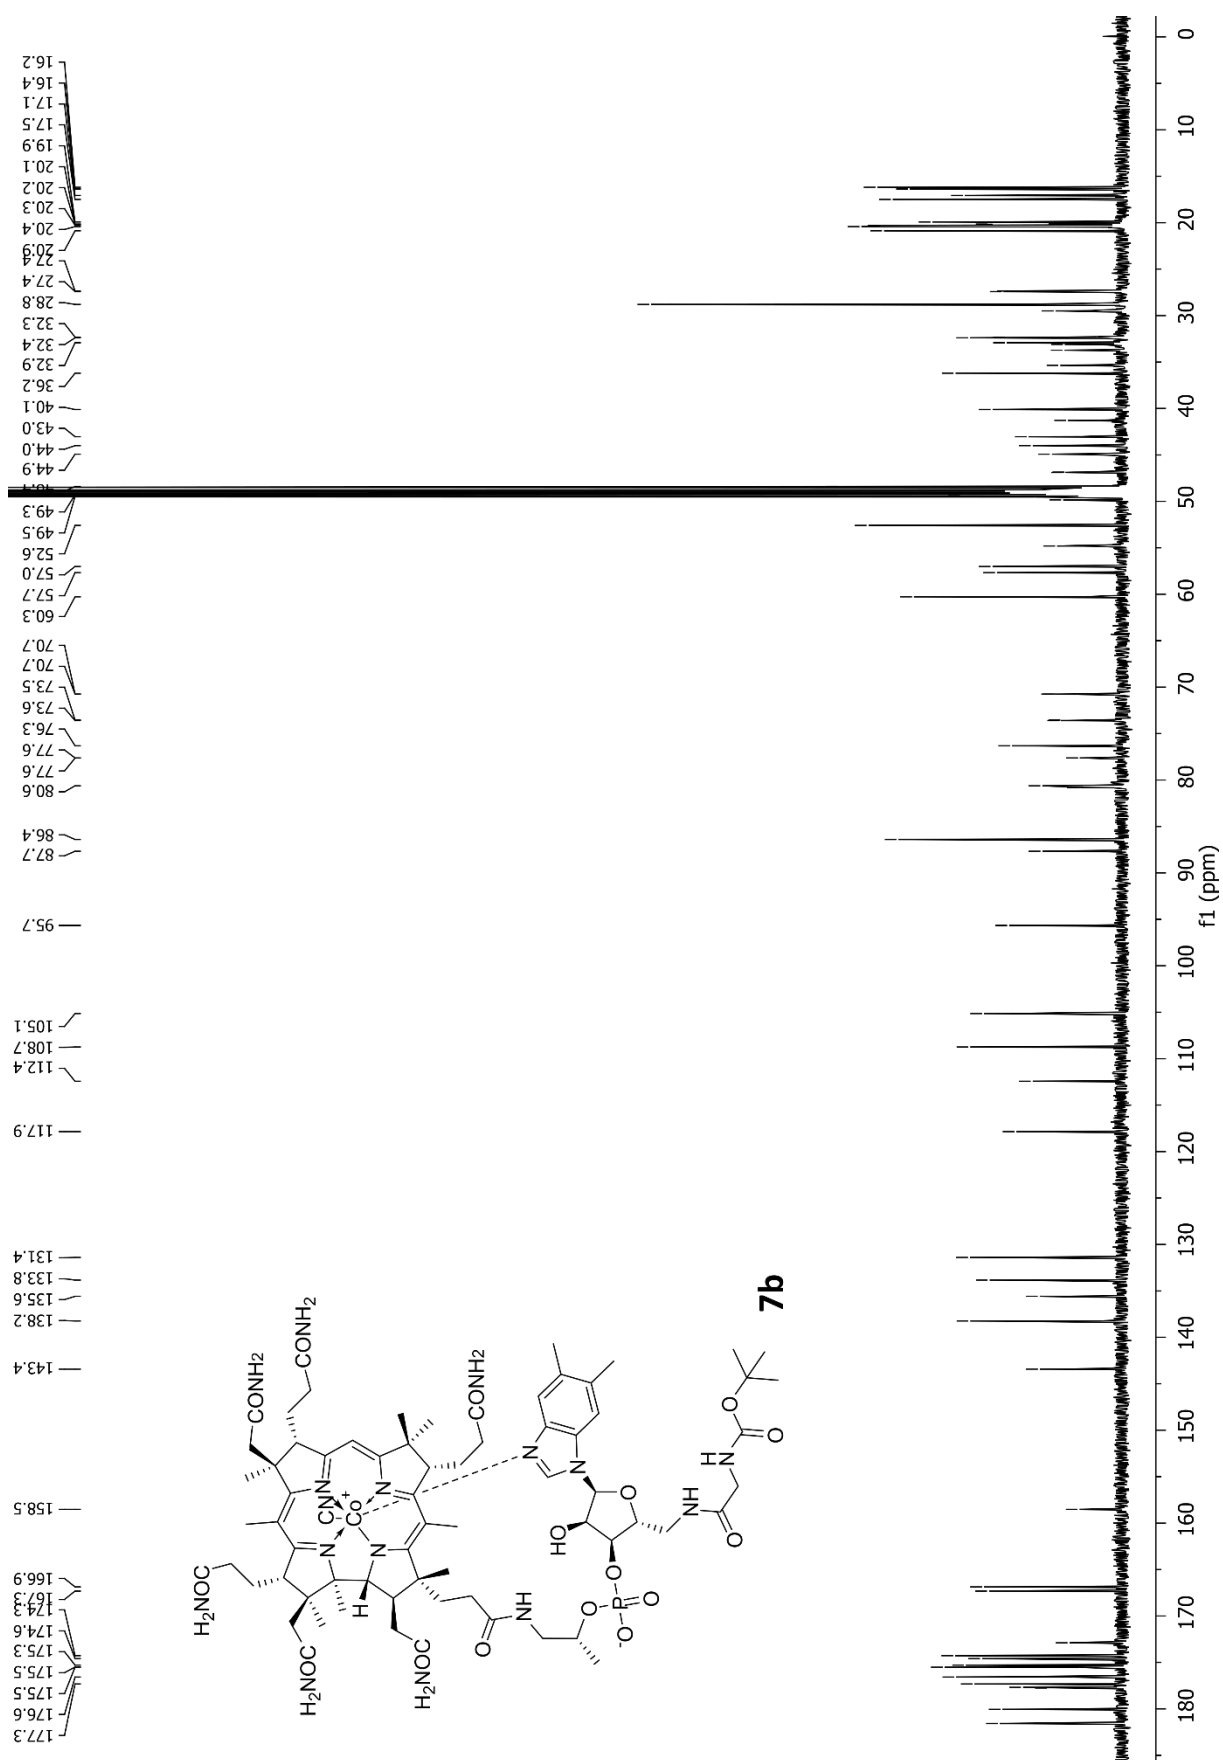

8.  $^1\text{H}$  NMR (500 MHz) and  $^{13}\text{C}$  NMR (126 MHz) of compound **7c** in  $\text{CD}_3\text{OD}$  (for clarity only well isolated signals are integrated)

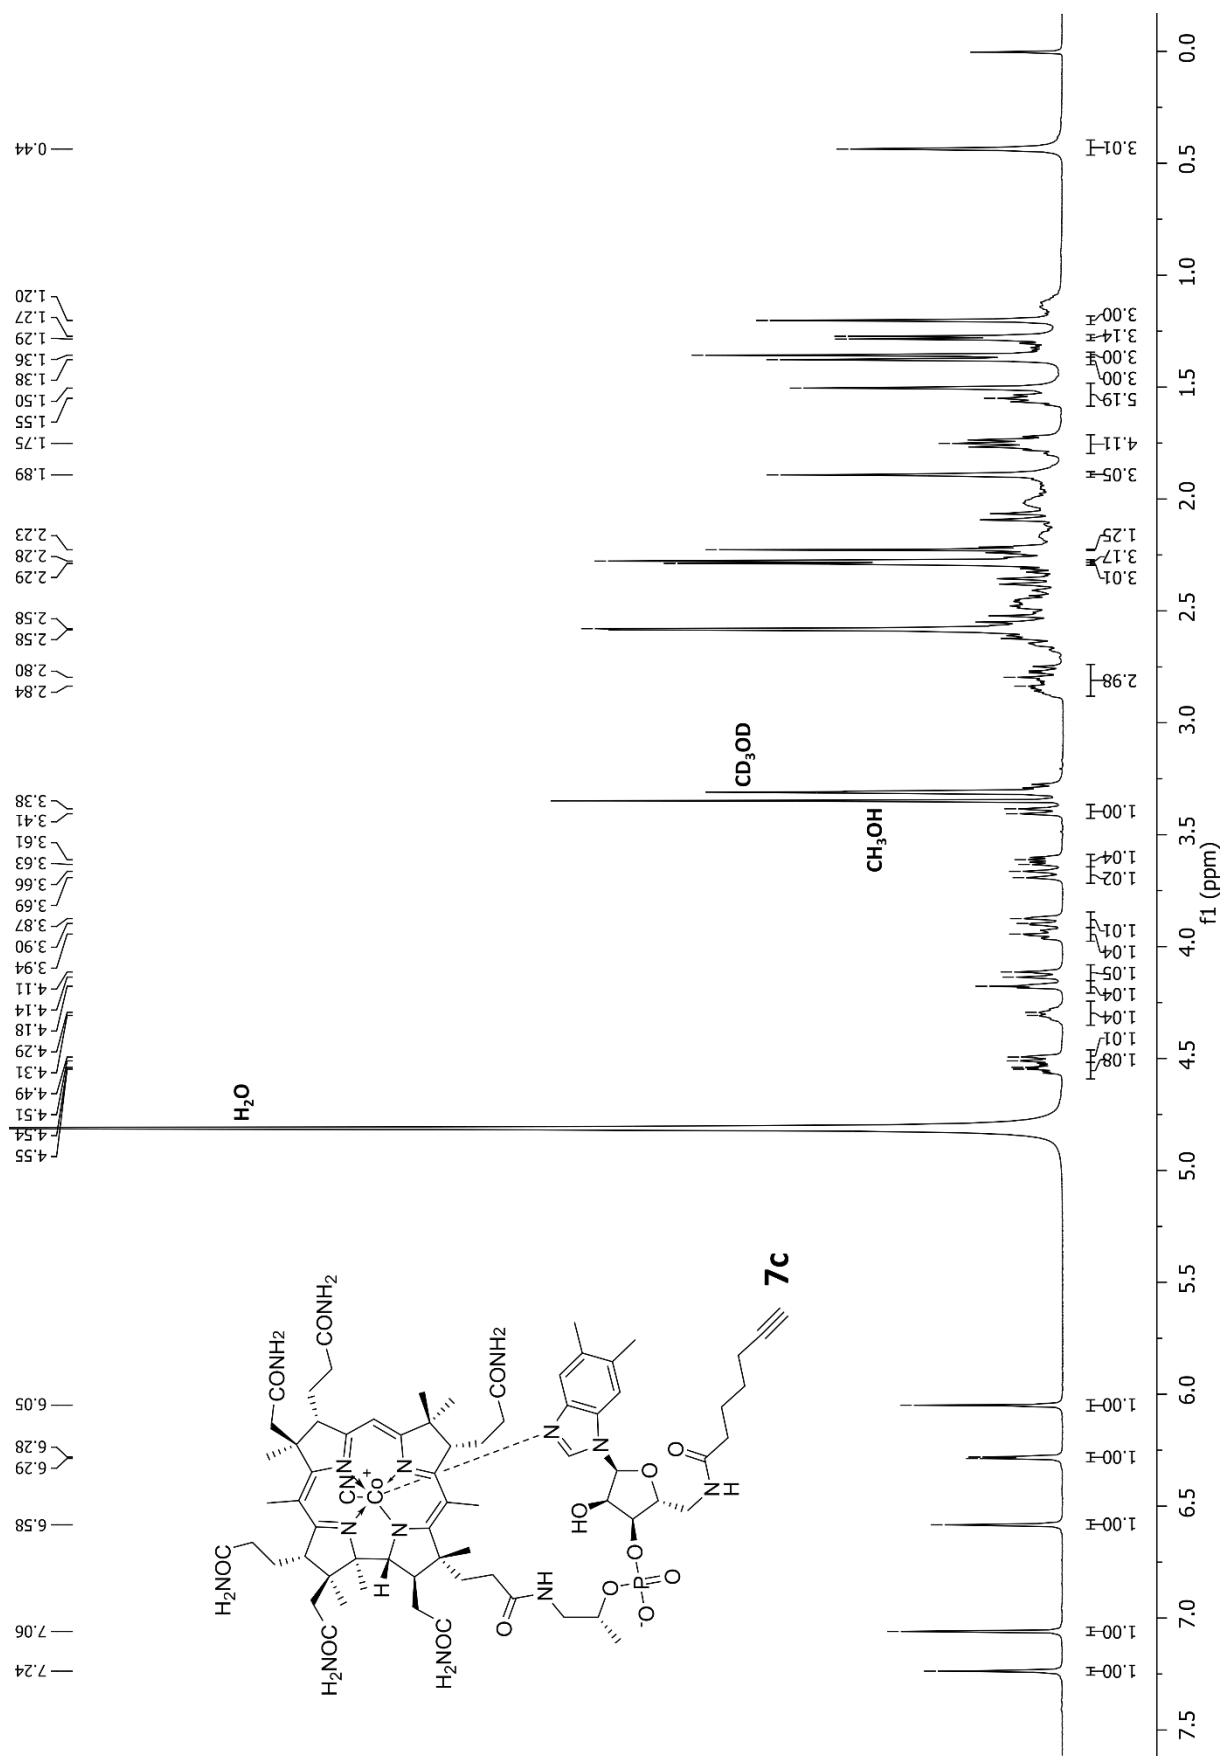

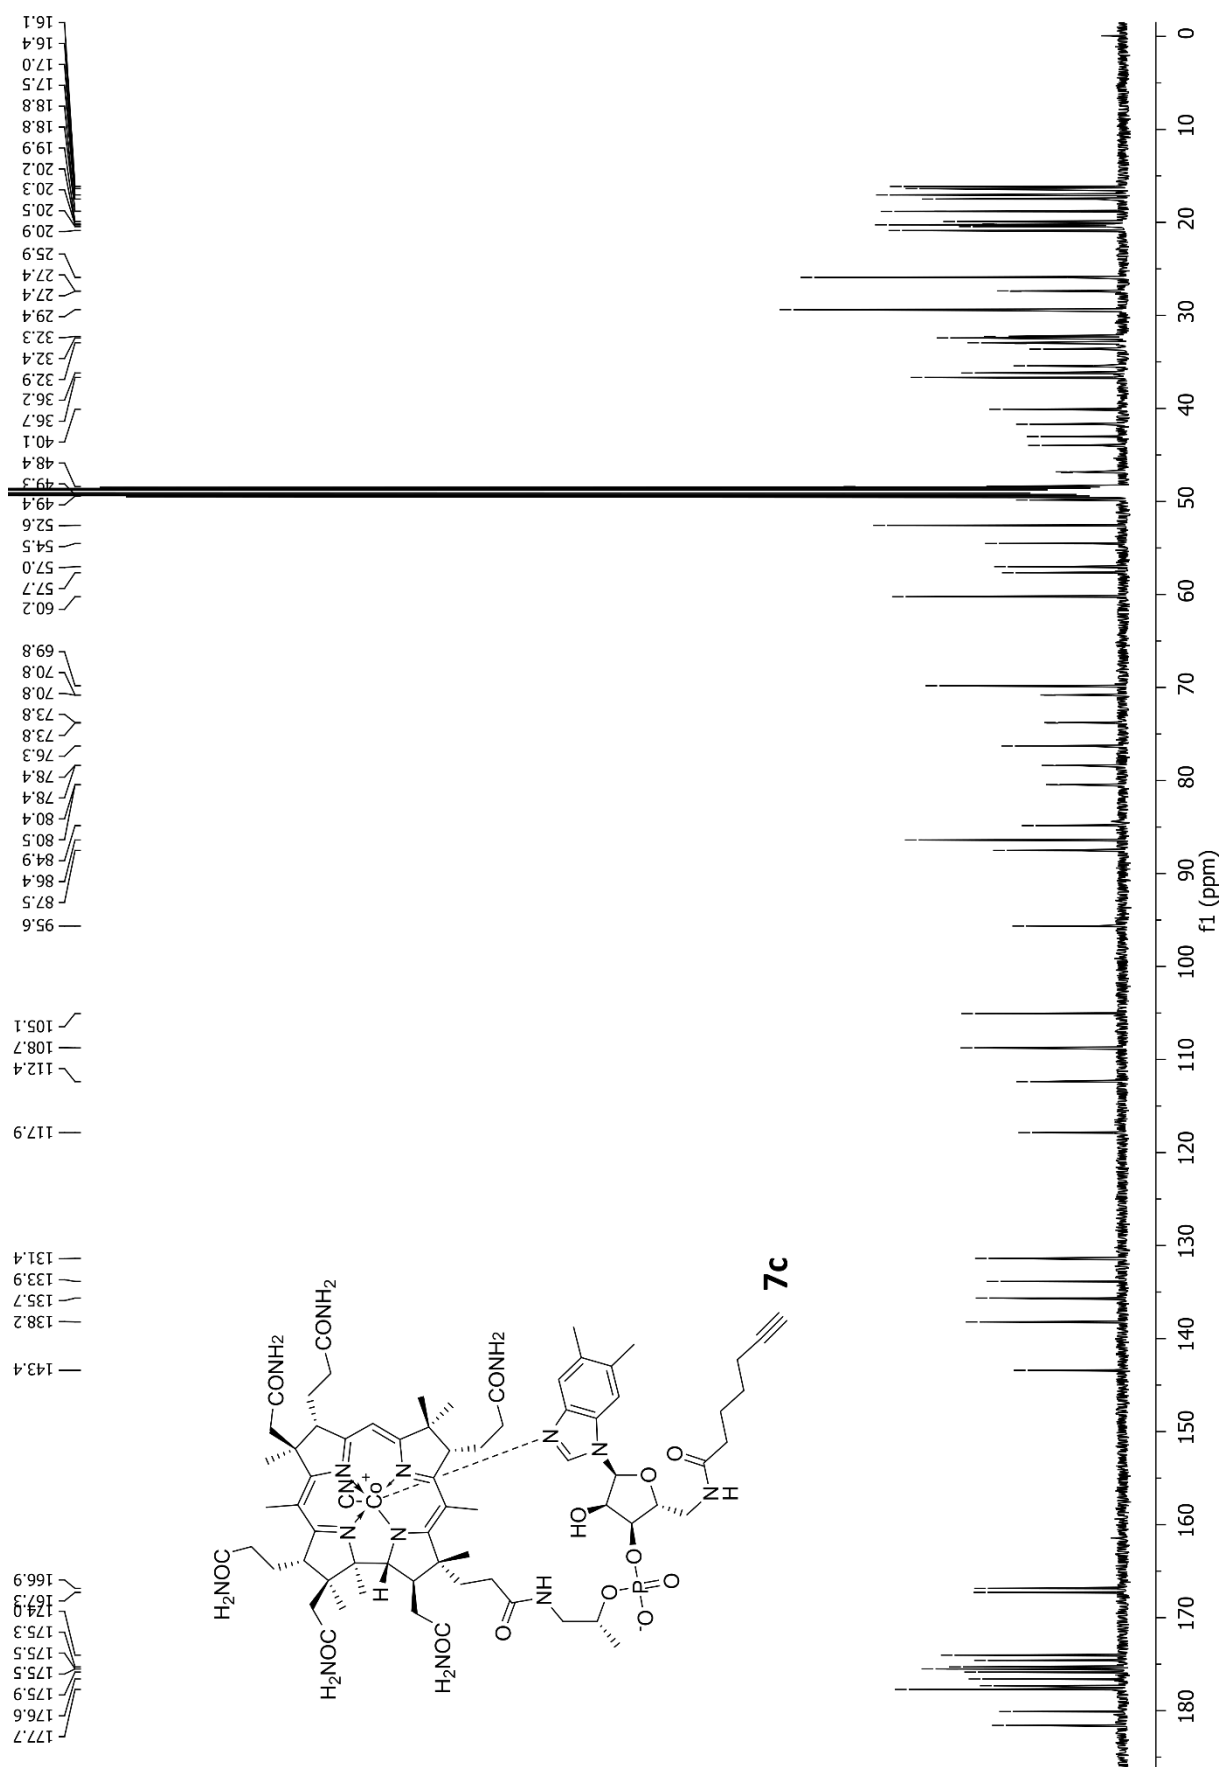

9.  $^1\text{H}$  NMR (500 MHz) and  $^{13}\text{C}$  NMR (126 MHz) of compound **7a** (in physiological conditions) in  $\text{CD}_3\text{OD}$  (for clarity only well isolated signals are integrated)

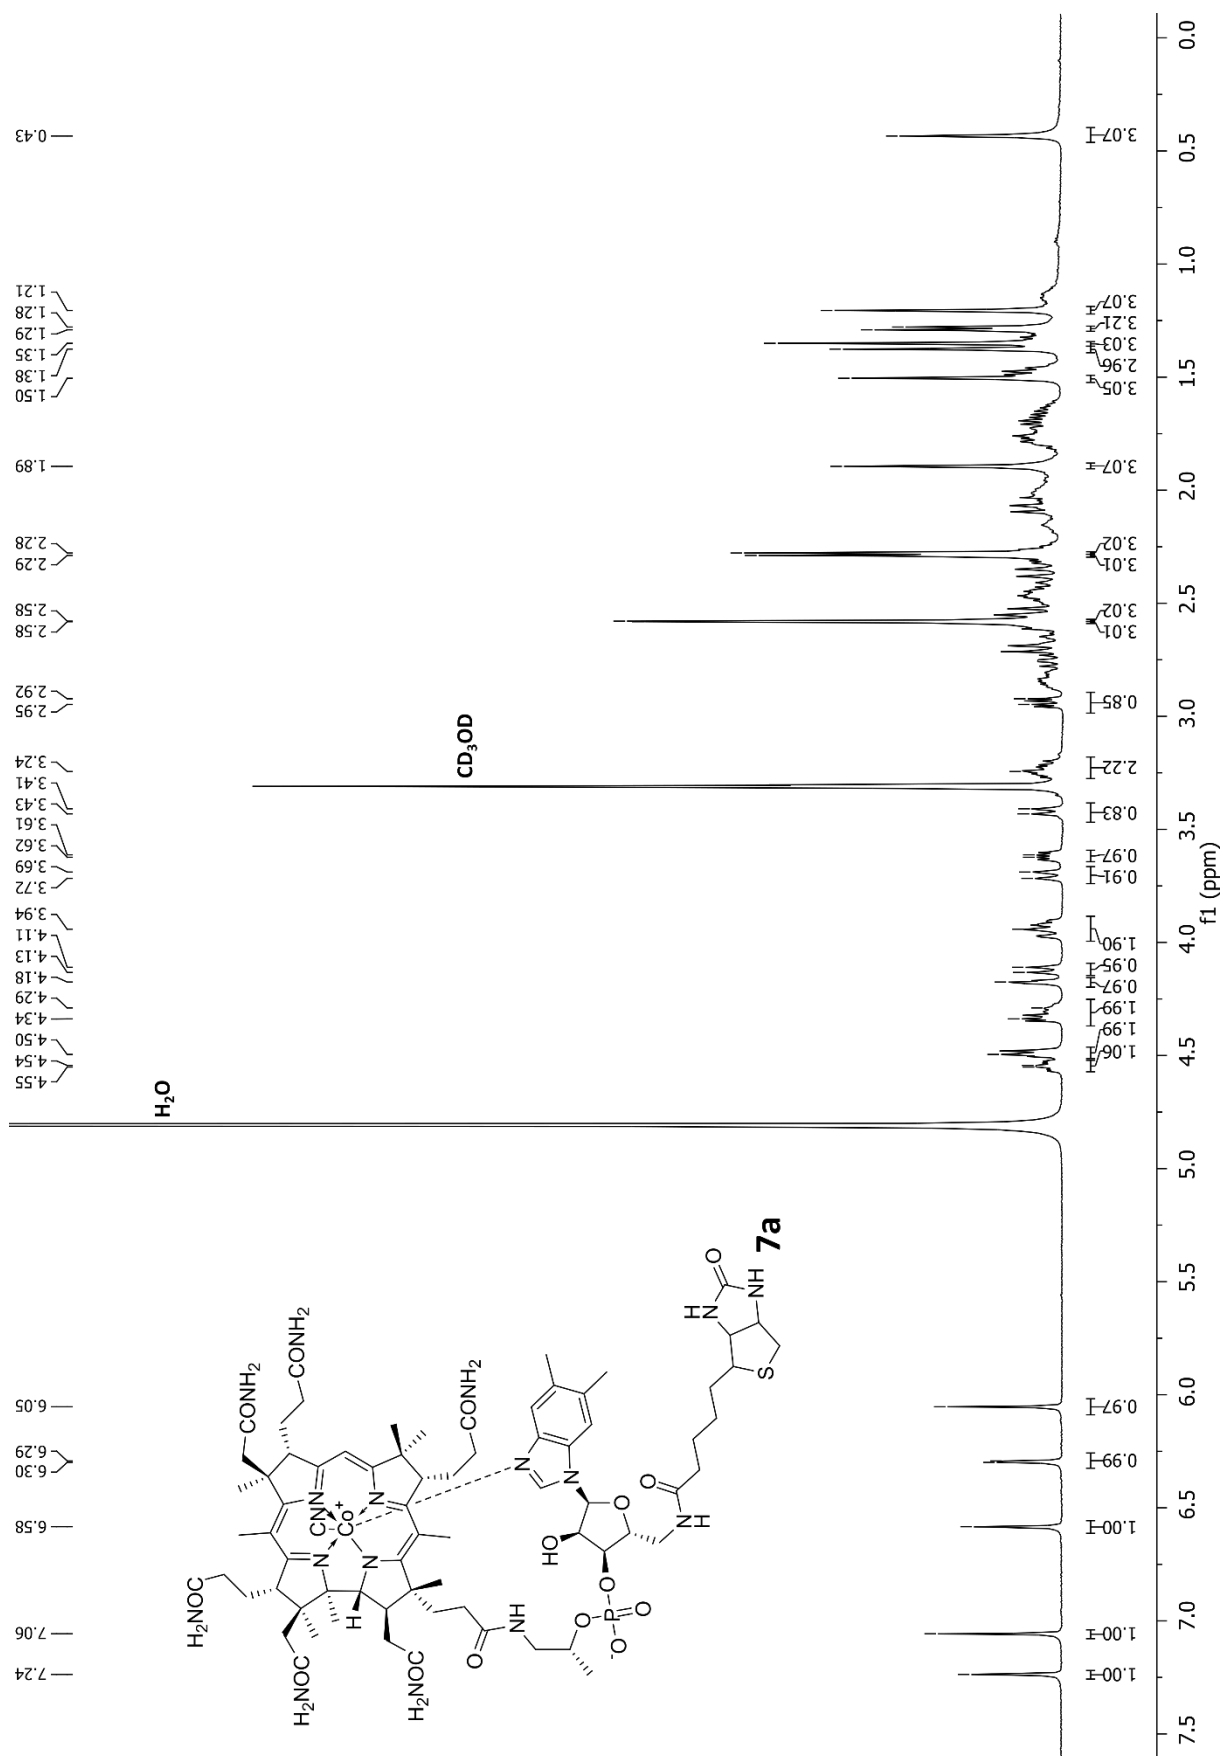

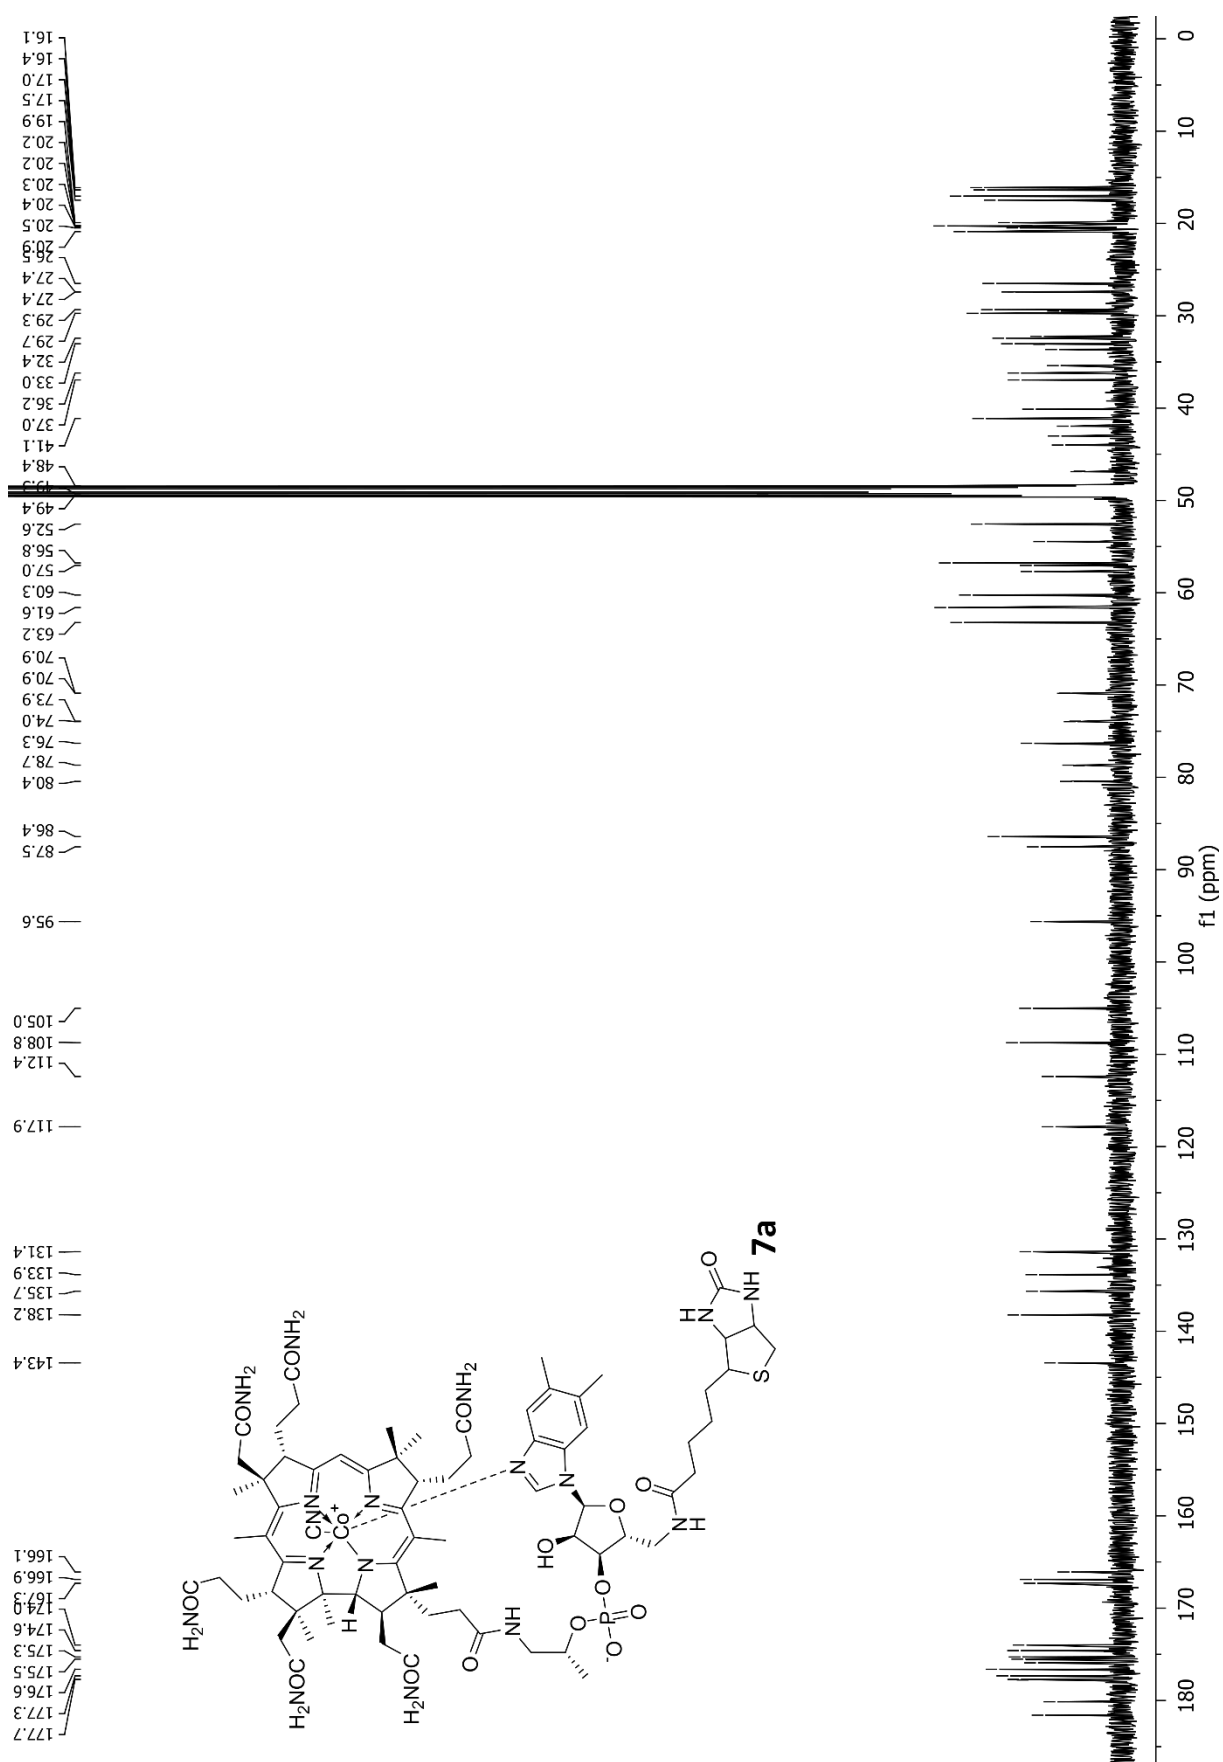



10. <sup>1</sup>H NMR (500 MHz) and <sup>13</sup>C NMR (126 MHz) of compound **7b** (with coupling reagent) in CD<sub>3</sub>OD (for clarity only well isolated signals are integrated)

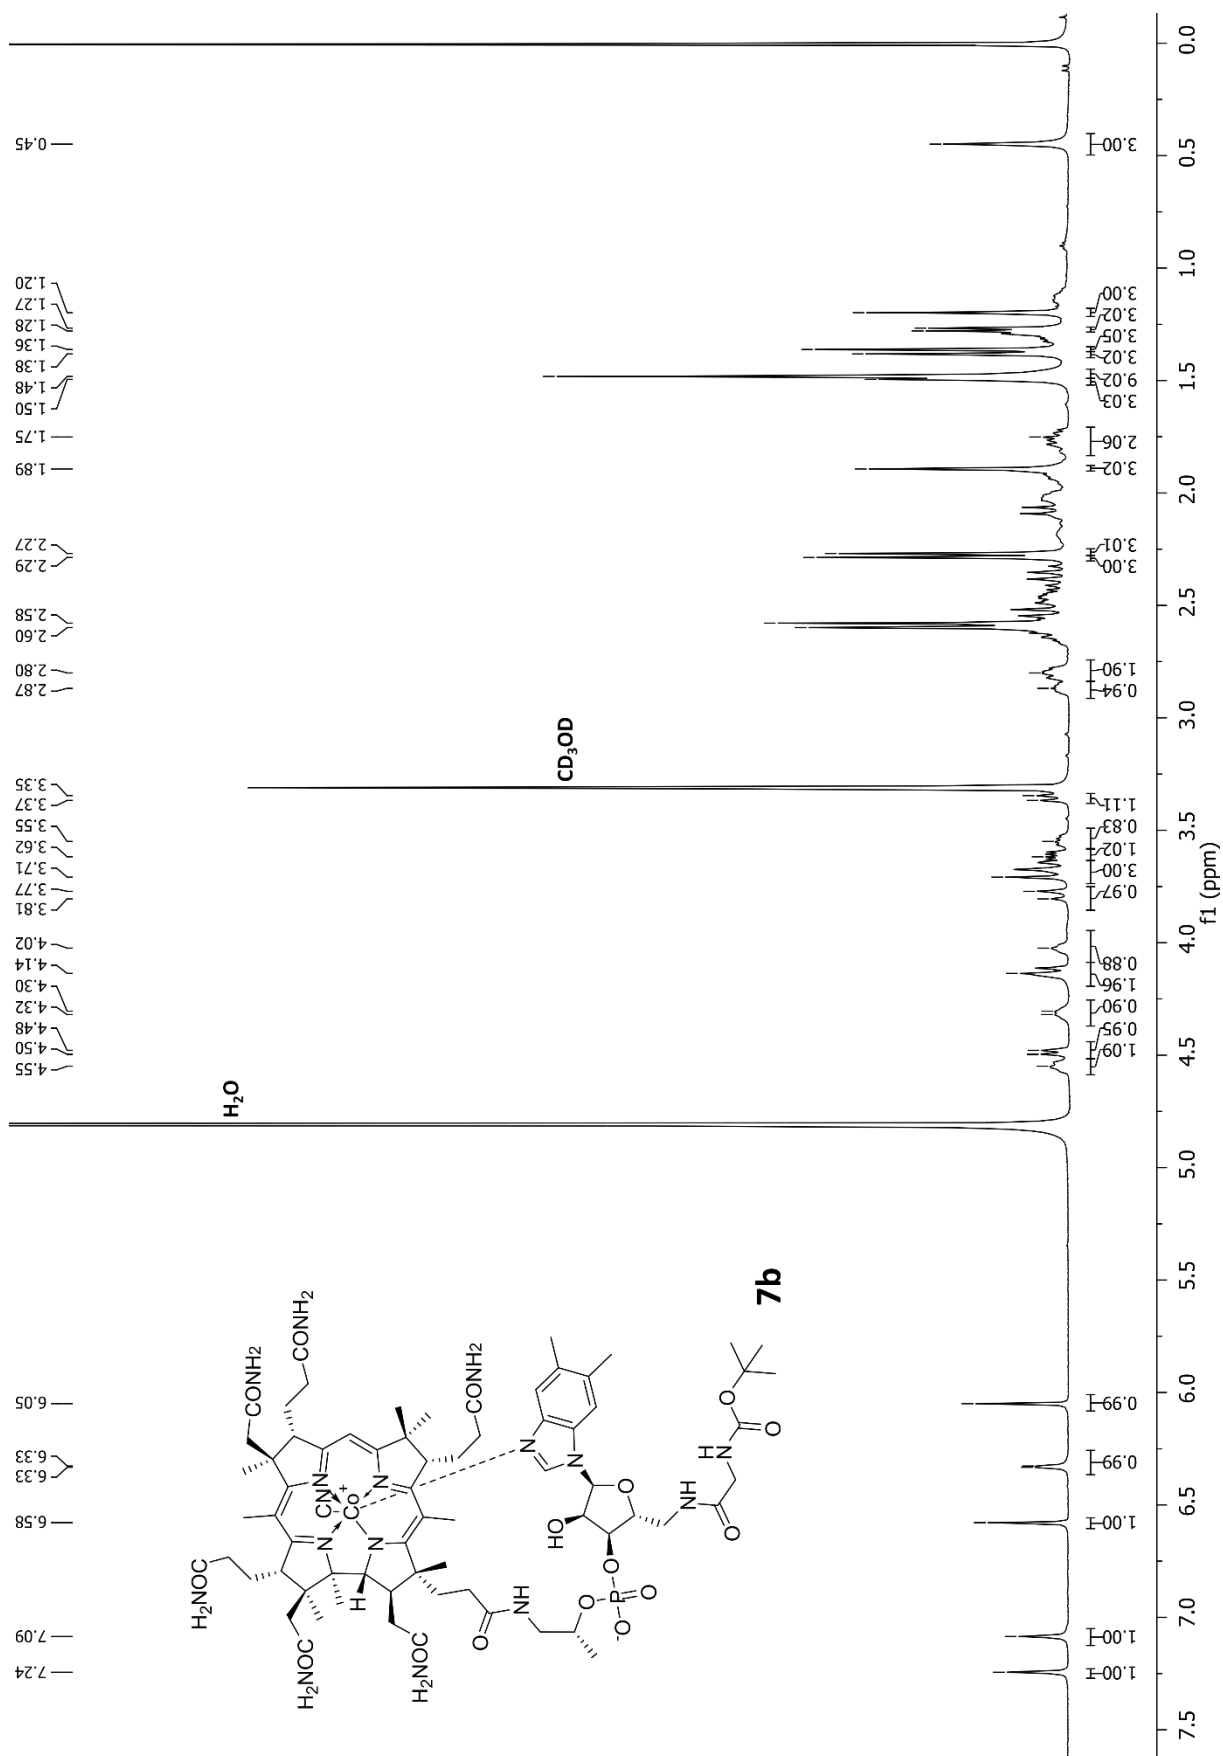

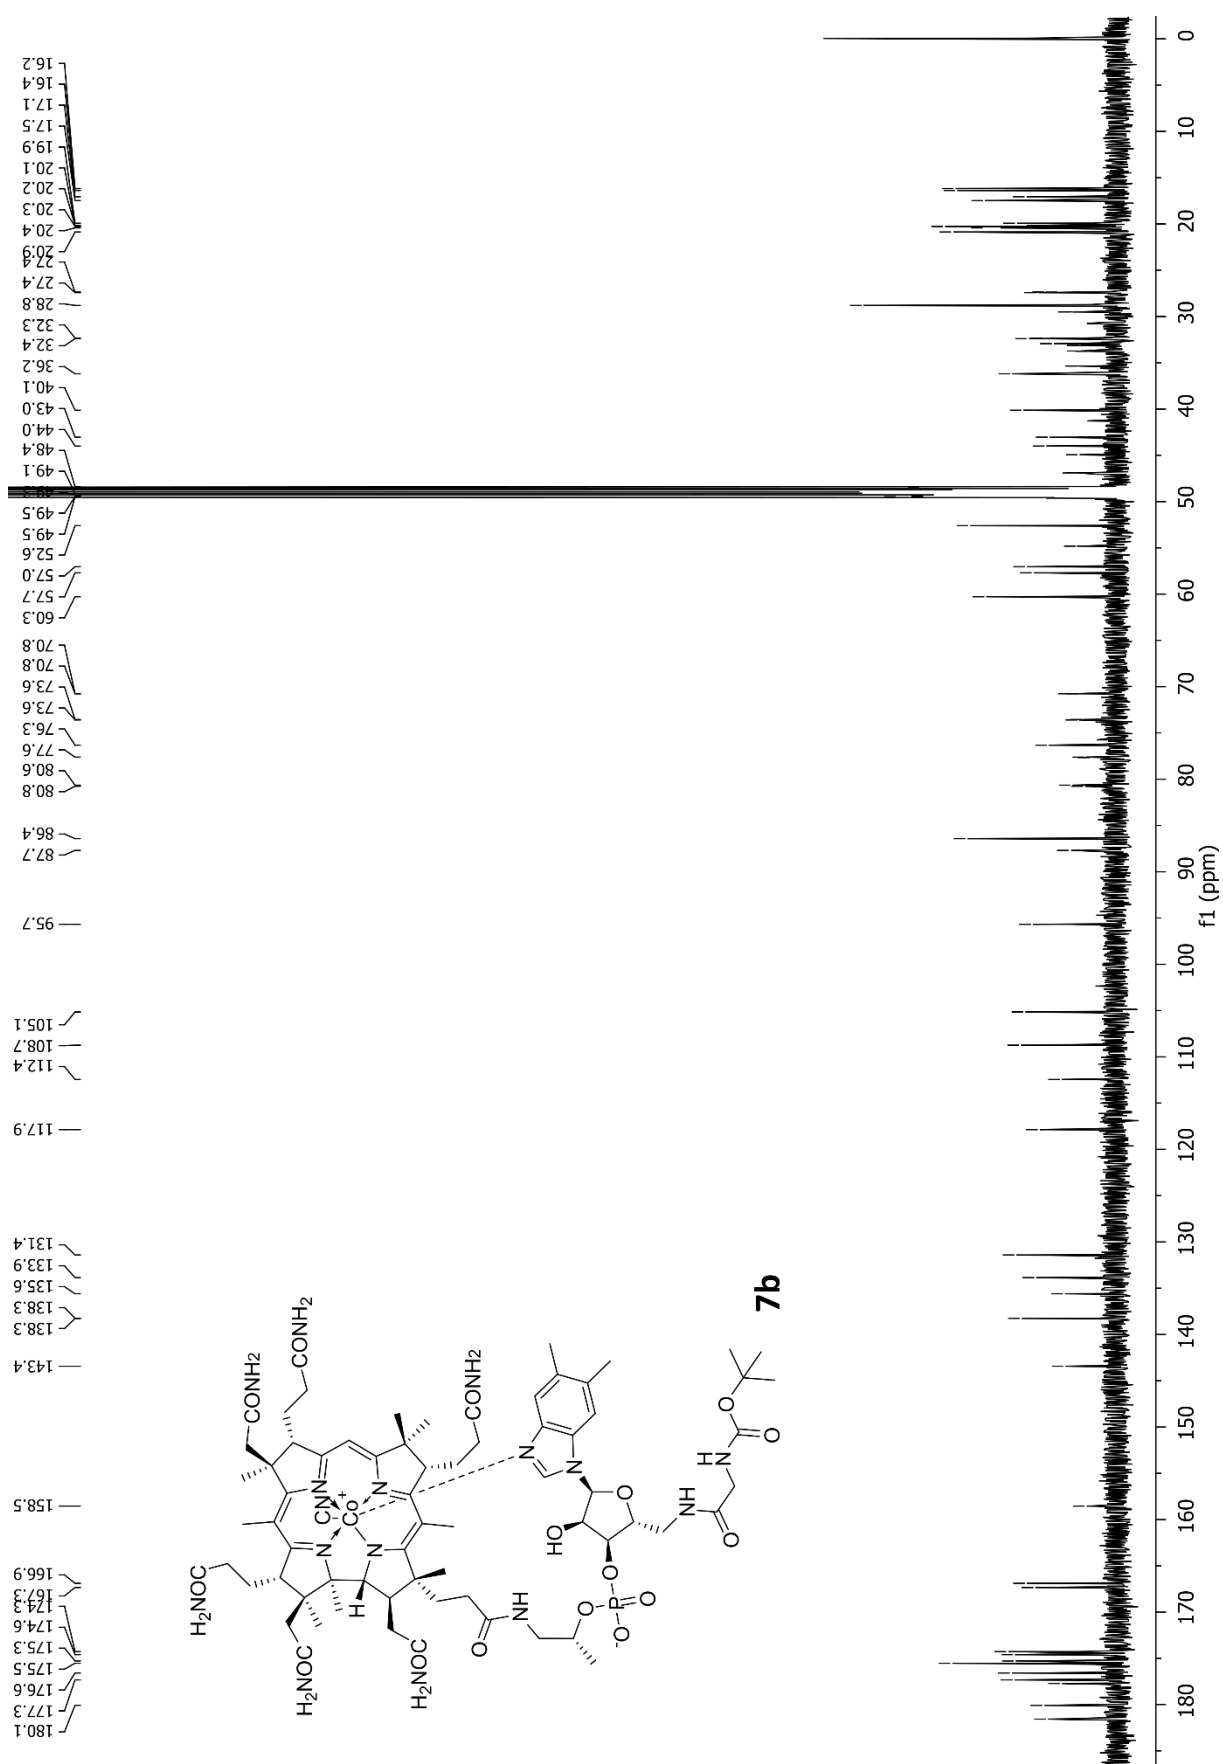

11.  $^1\text{H}$  NMR (500 MHz) and  $^{13}\text{C}$  NMR (126 MHz) of compound **7d** (with coupling reagent) in  $\text{CD}_3\text{OD}$  (for clarity only well isolated signals are integrated)

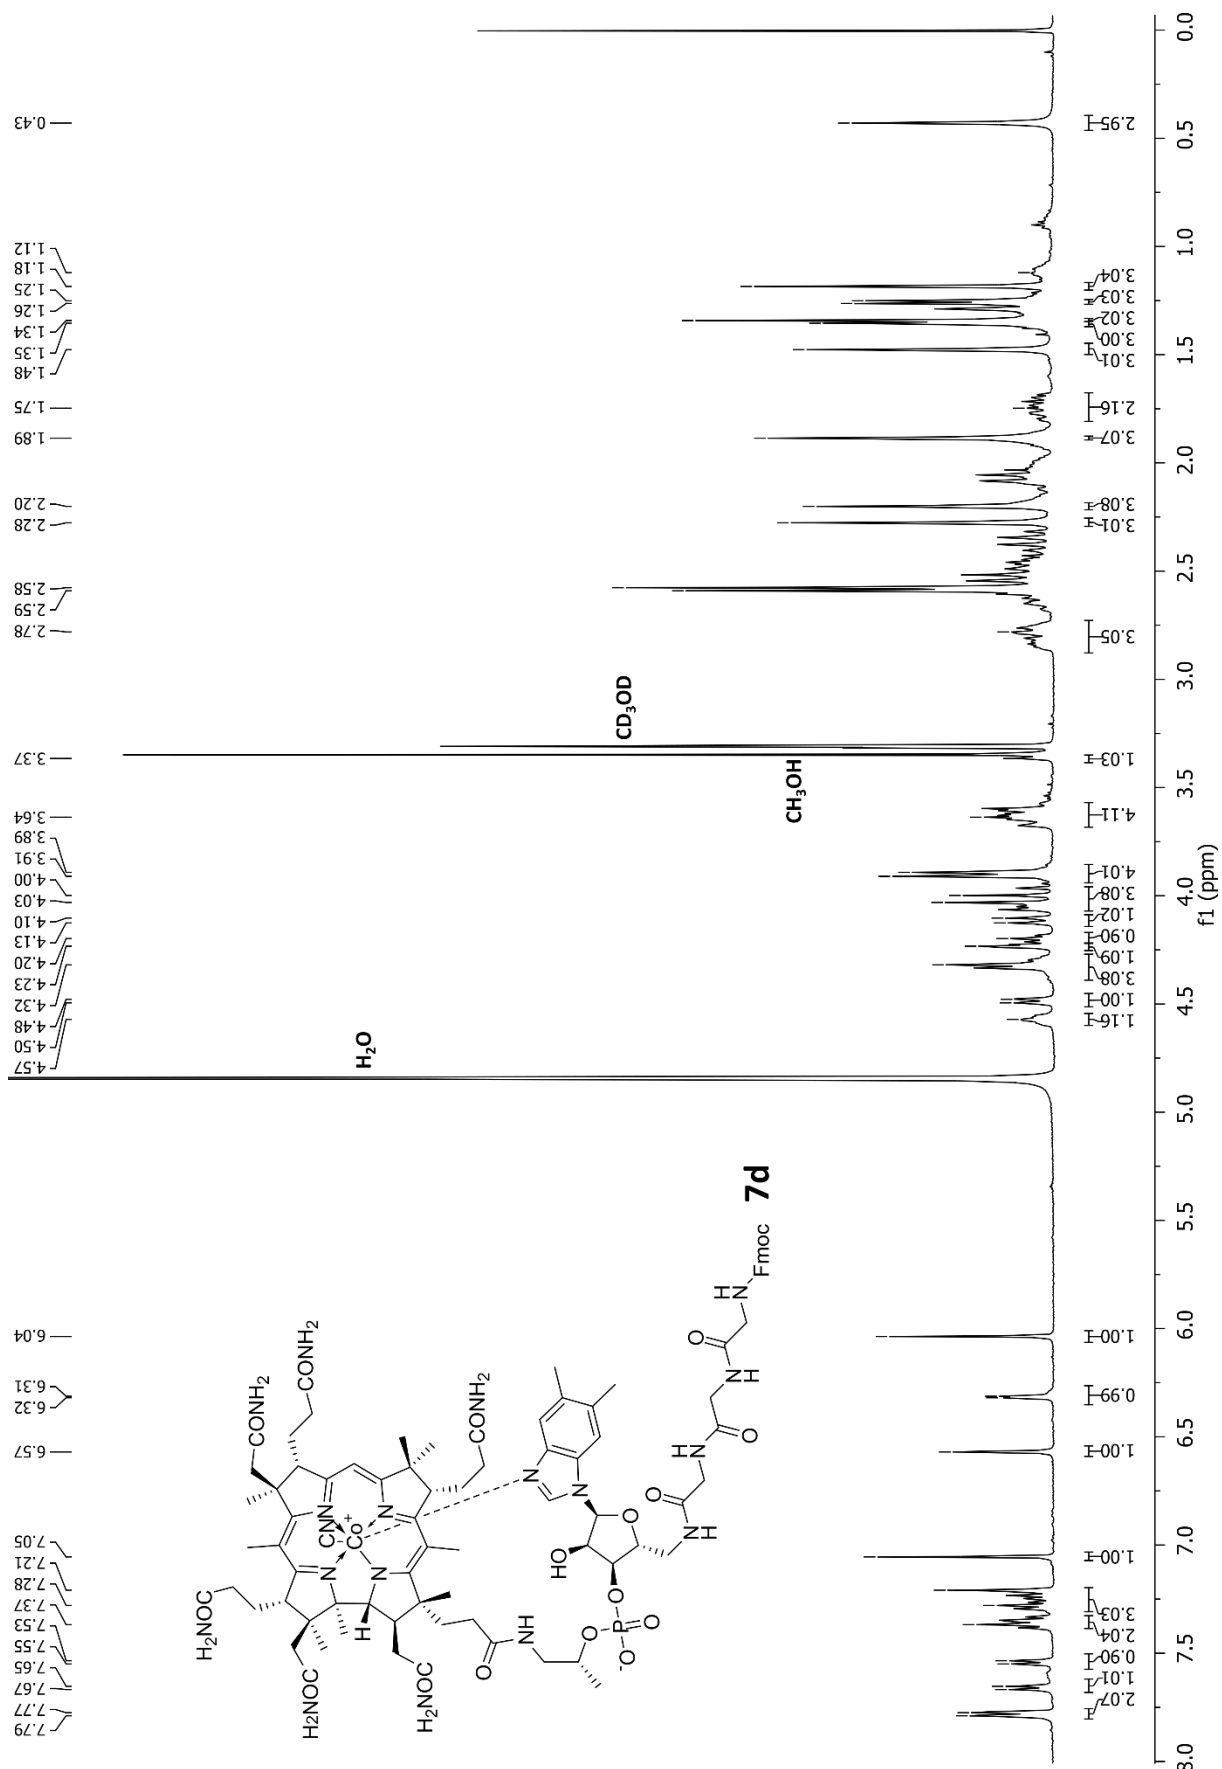

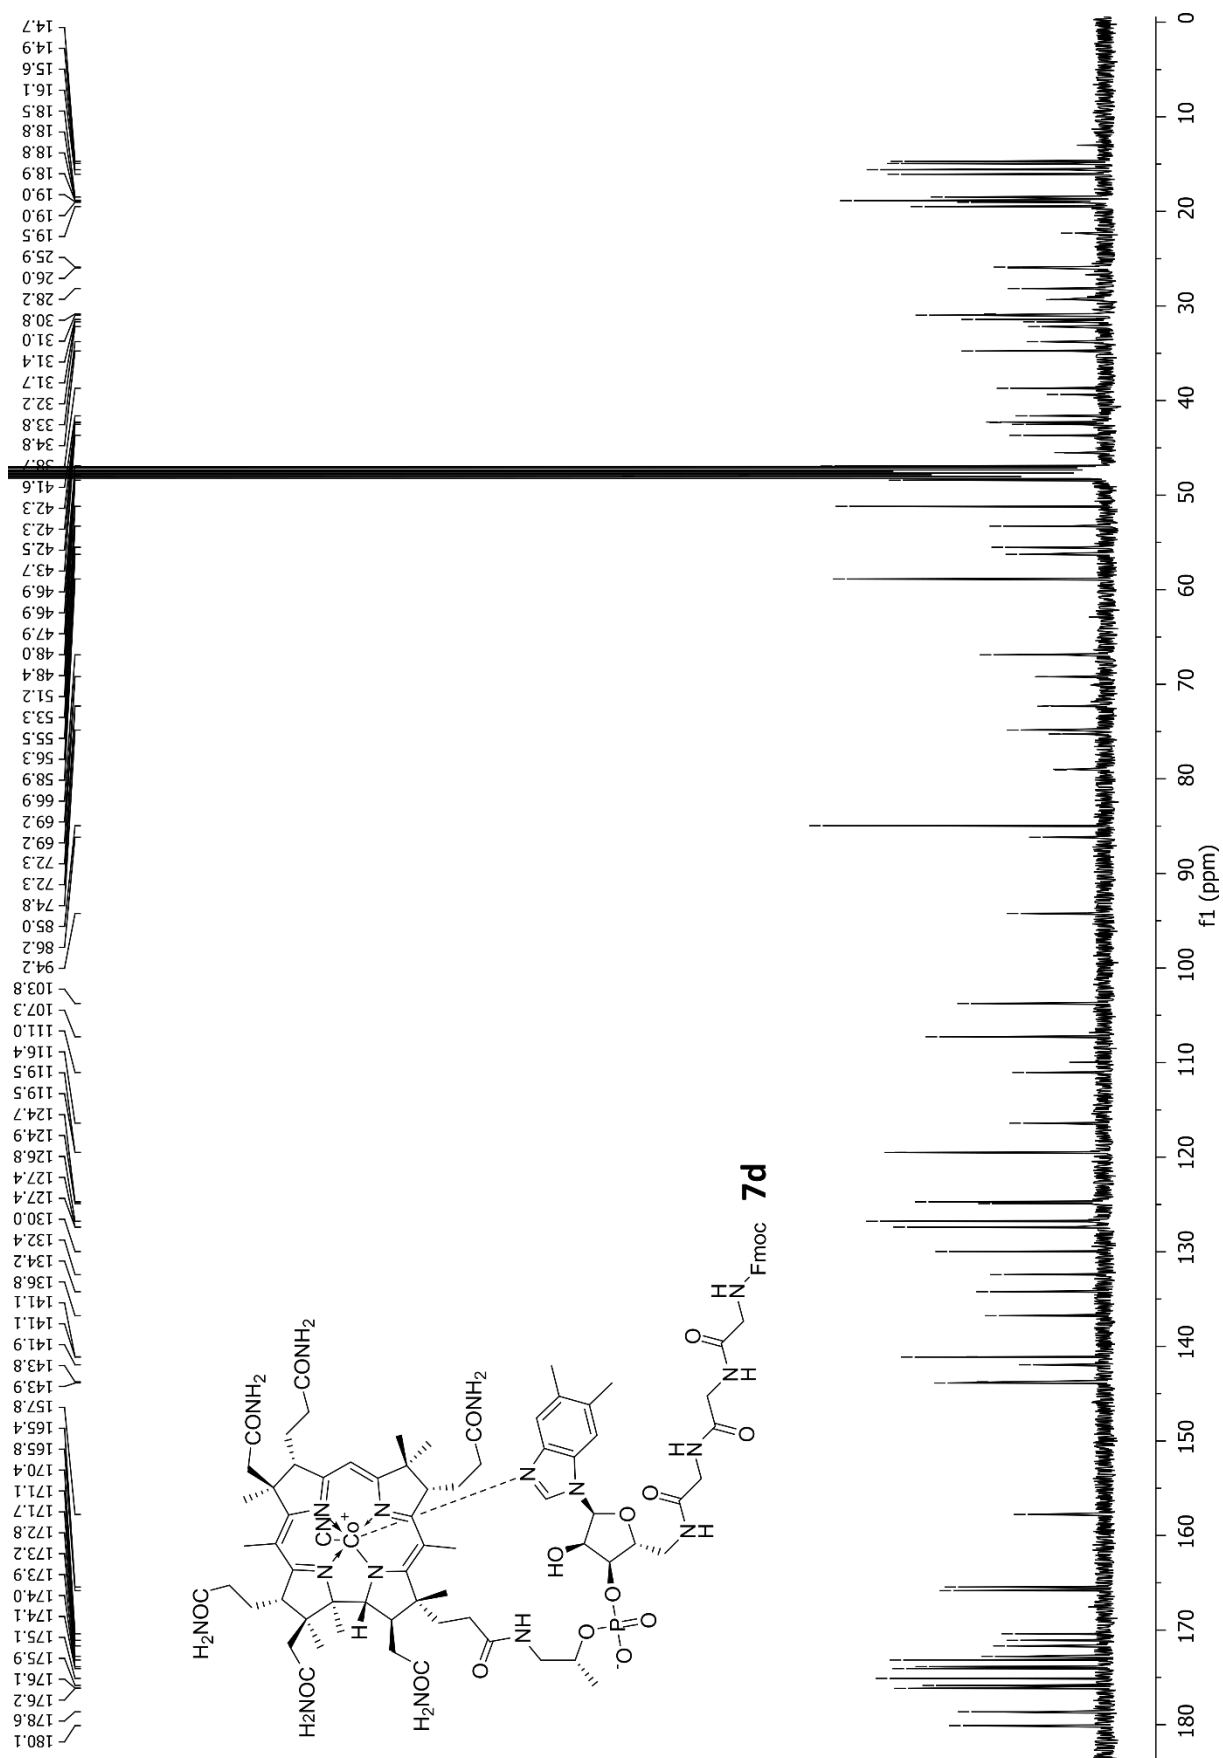

12.  $^1\text{H}$  NMR (500 MHz) and  $^{13}\text{C}$  NMR (126 MHz) of compound **8** in  $\text{CD}_3\text{OD}$  (for clarity only well isolated signals are integrated)

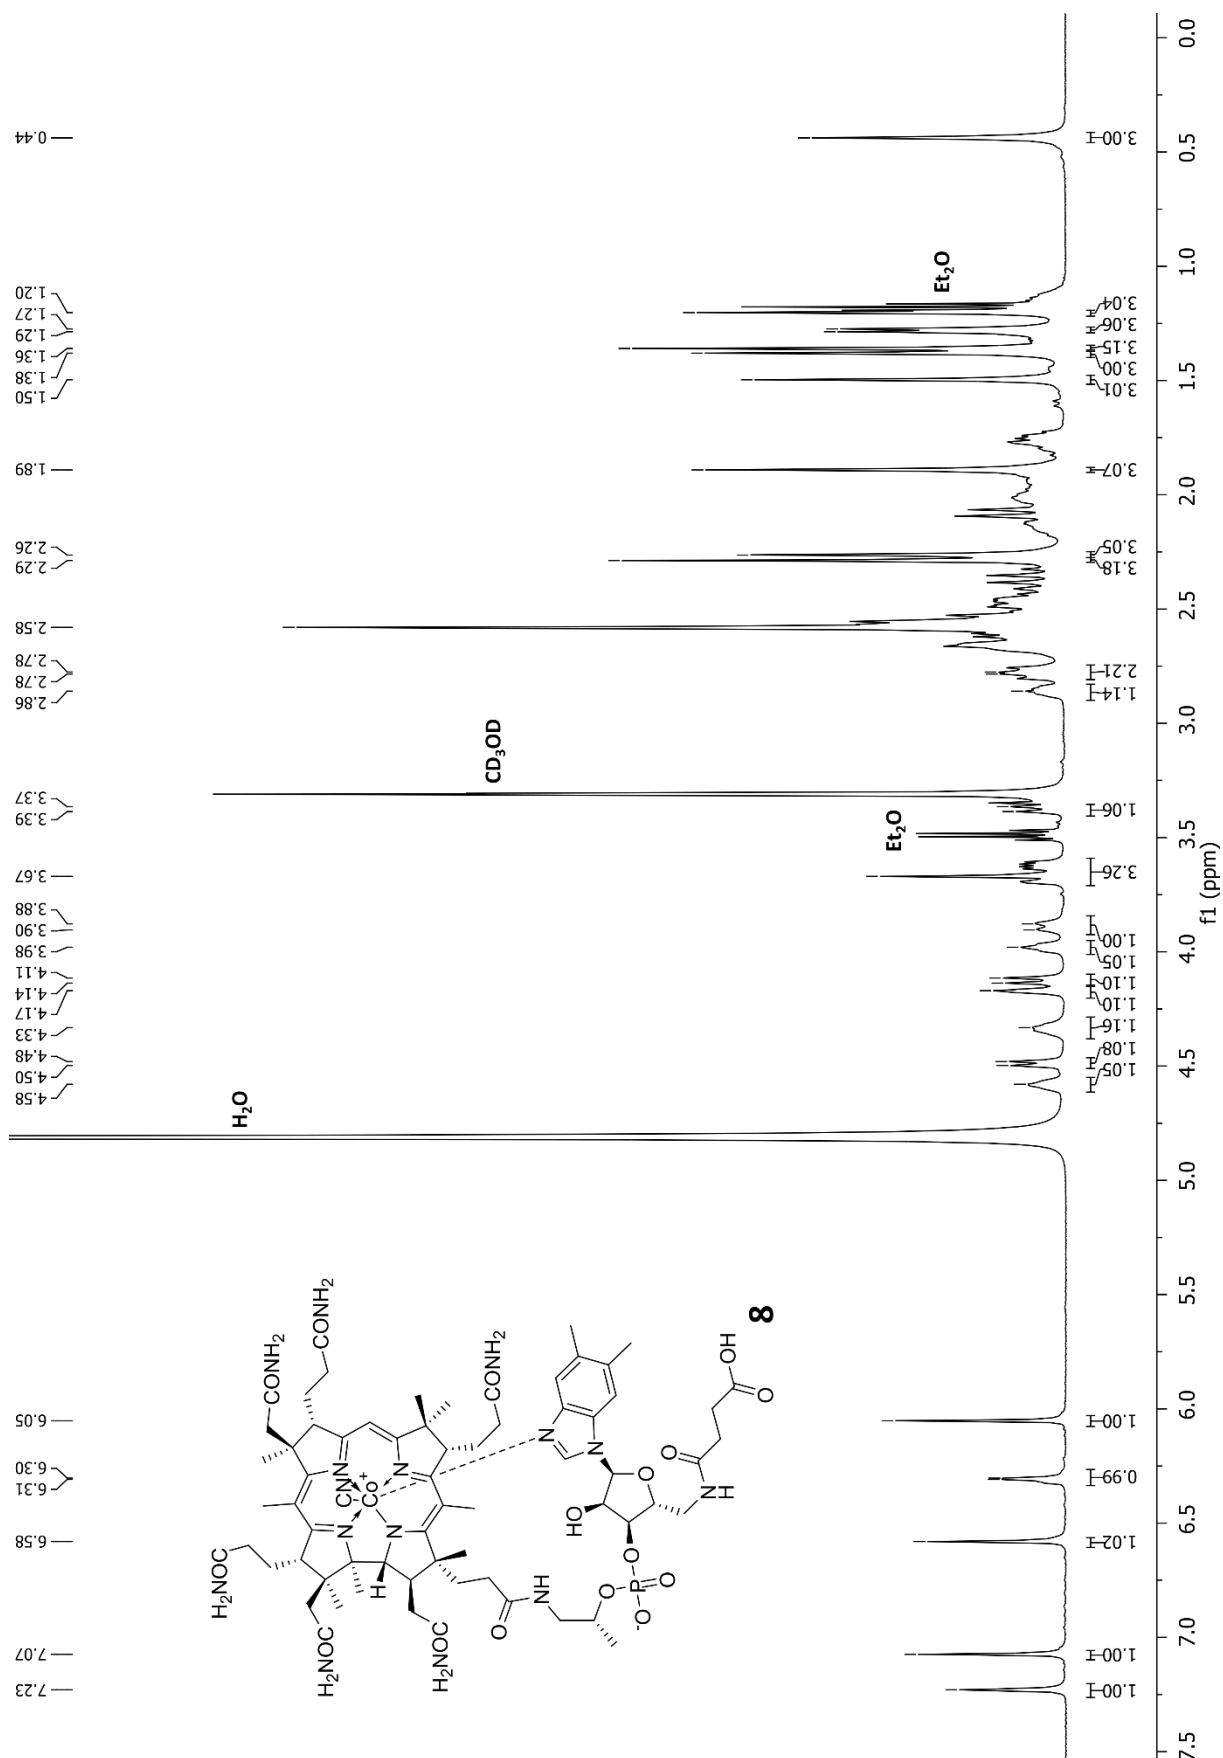

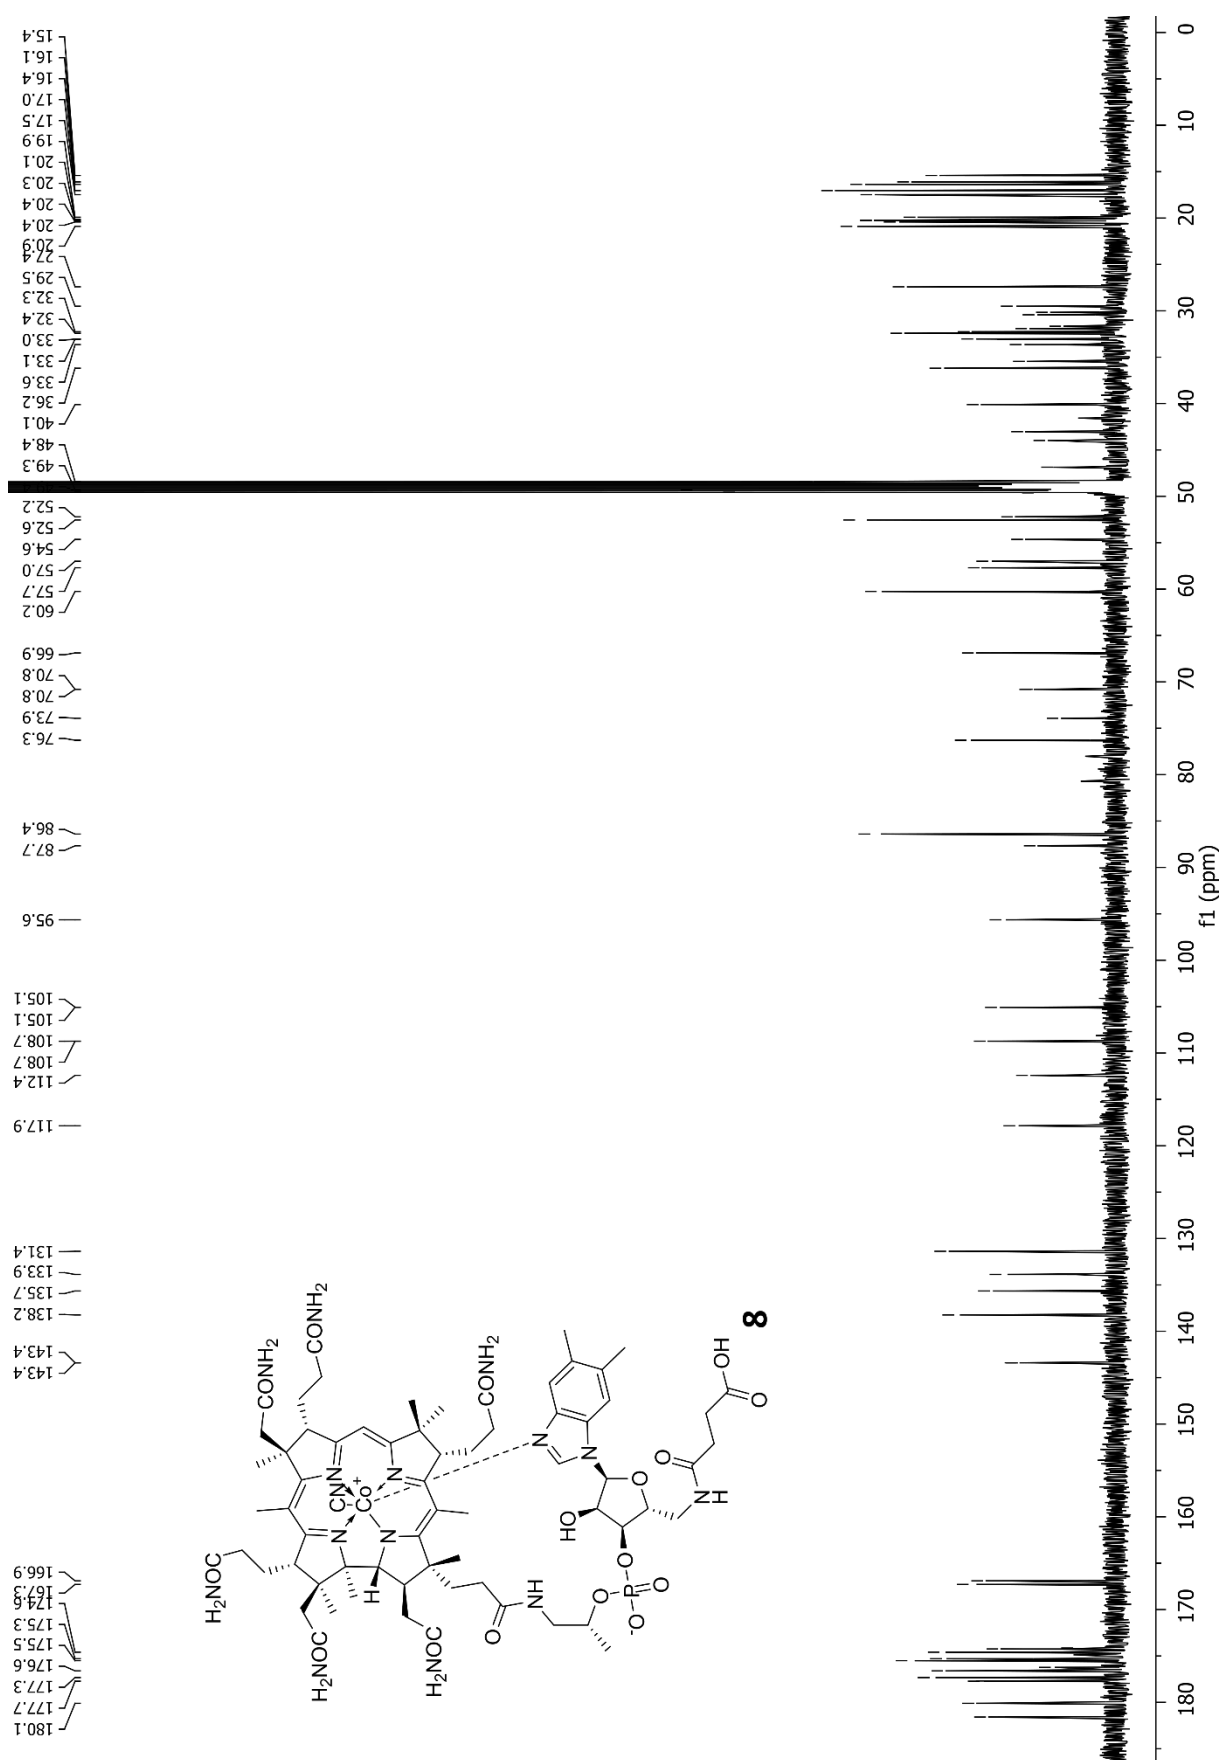

13.  $^1\text{H}$  NMR (500 MHz) and  $^{13}\text{C}$  NMR (126 MHz) of compound **11a** (via active ester step)  
in  $\text{CD}_3\text{OD}$  (for clarity only well isolated signals are integrated)

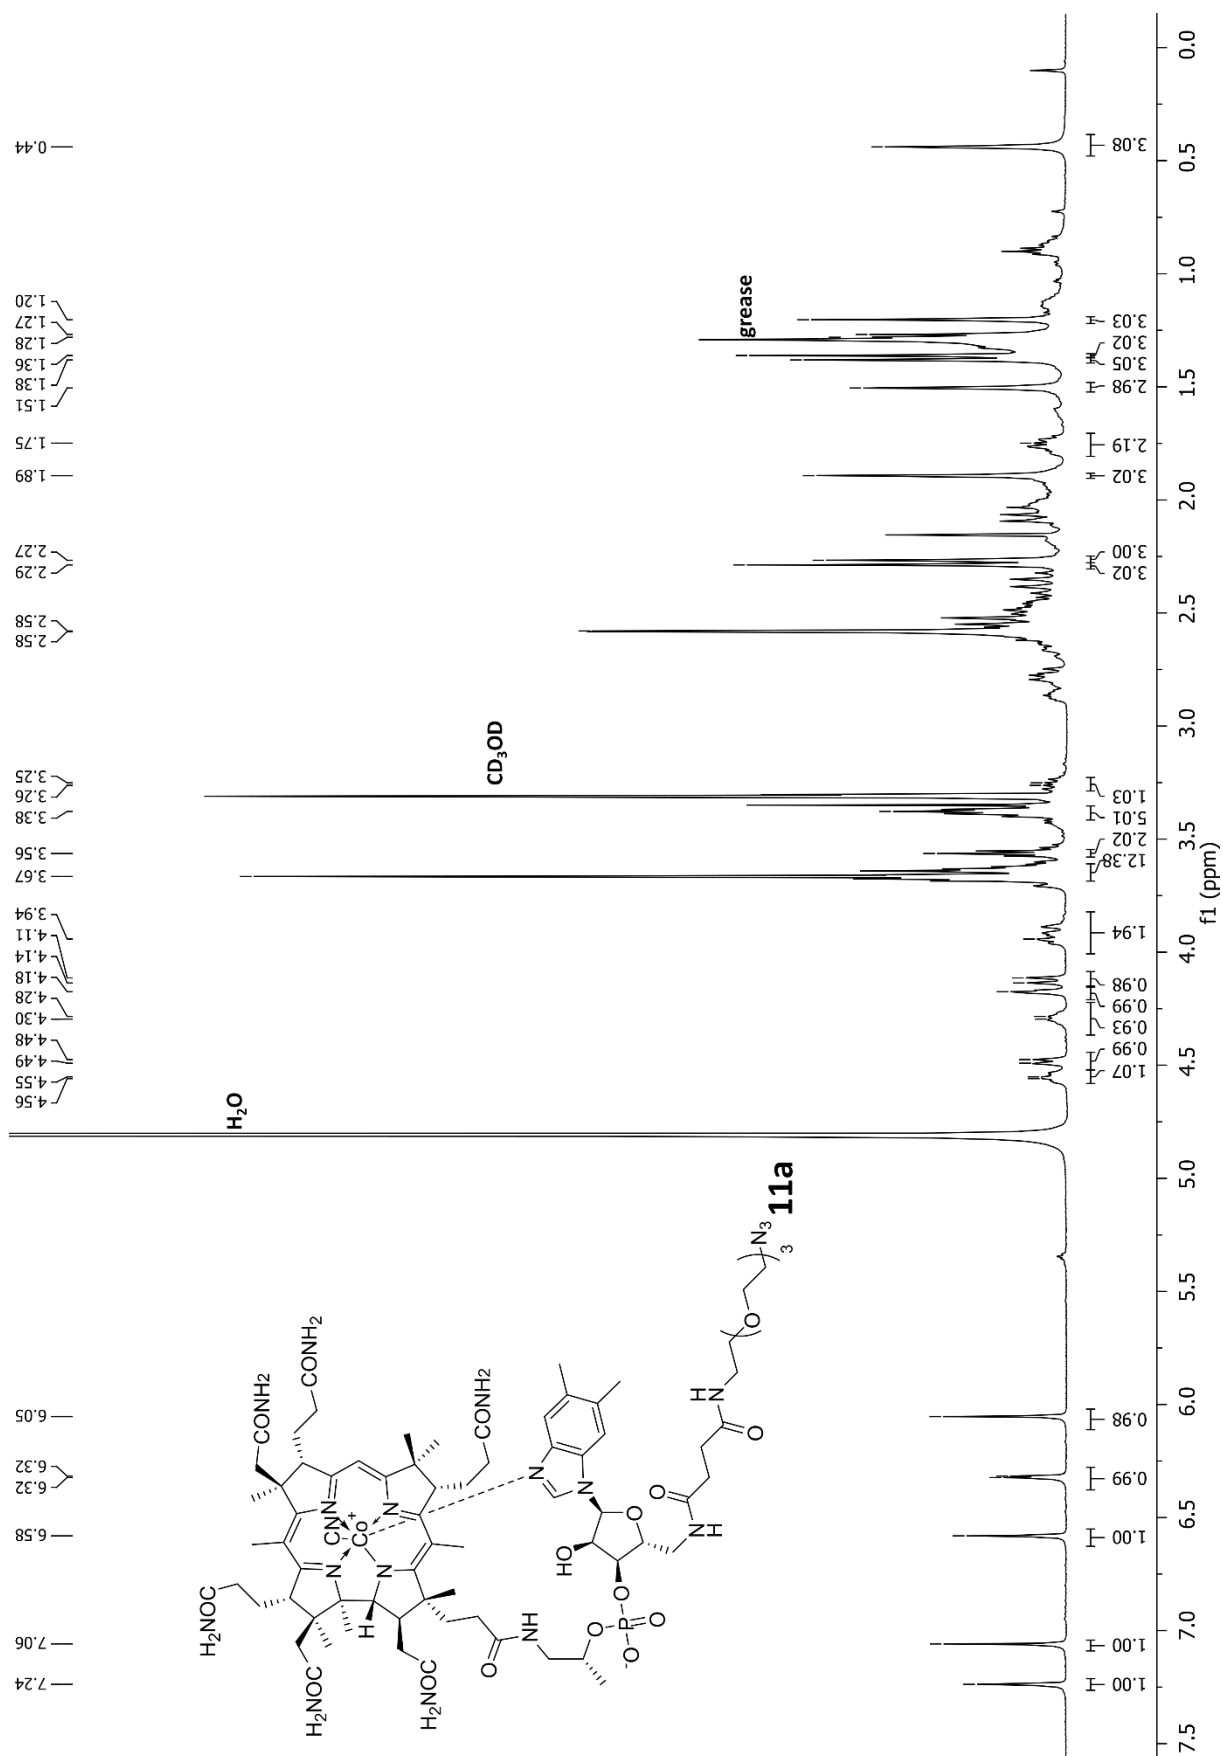

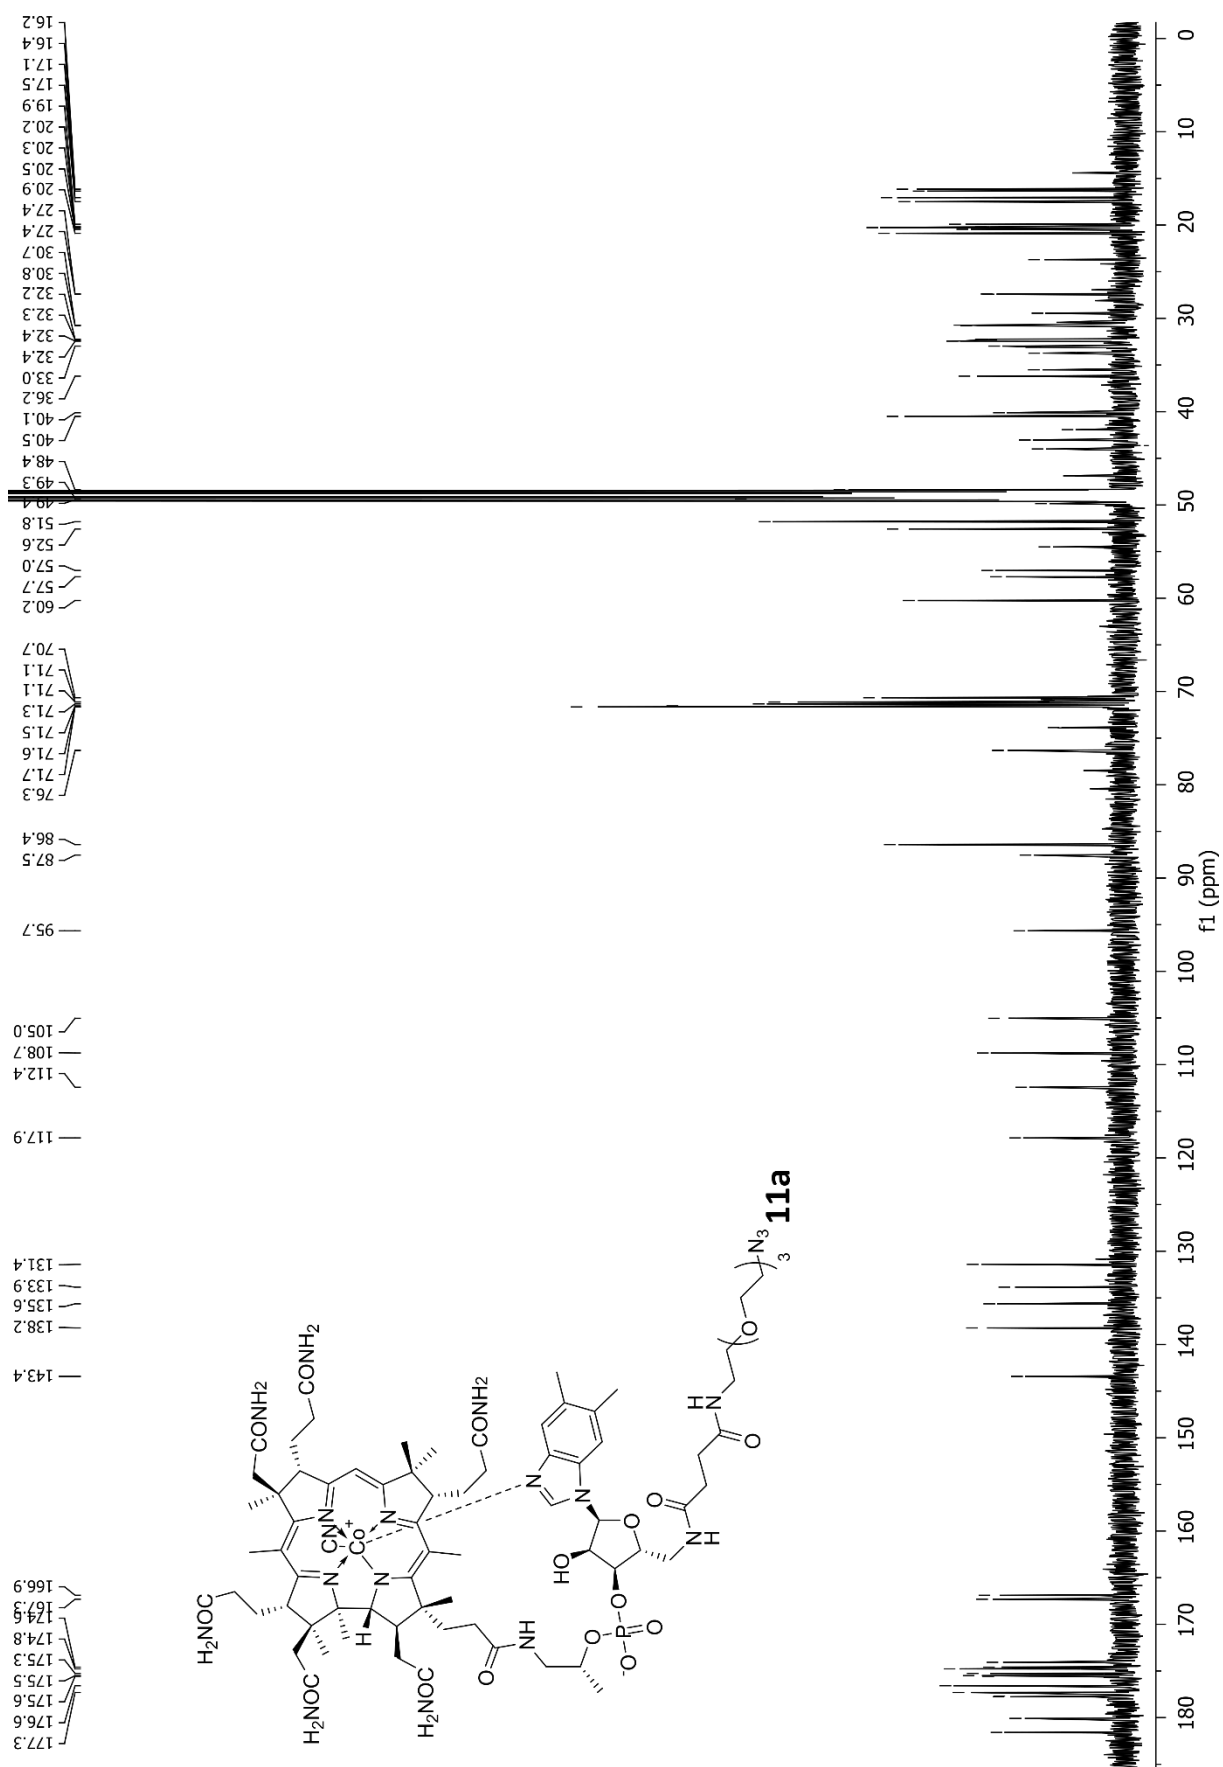



[illegible]

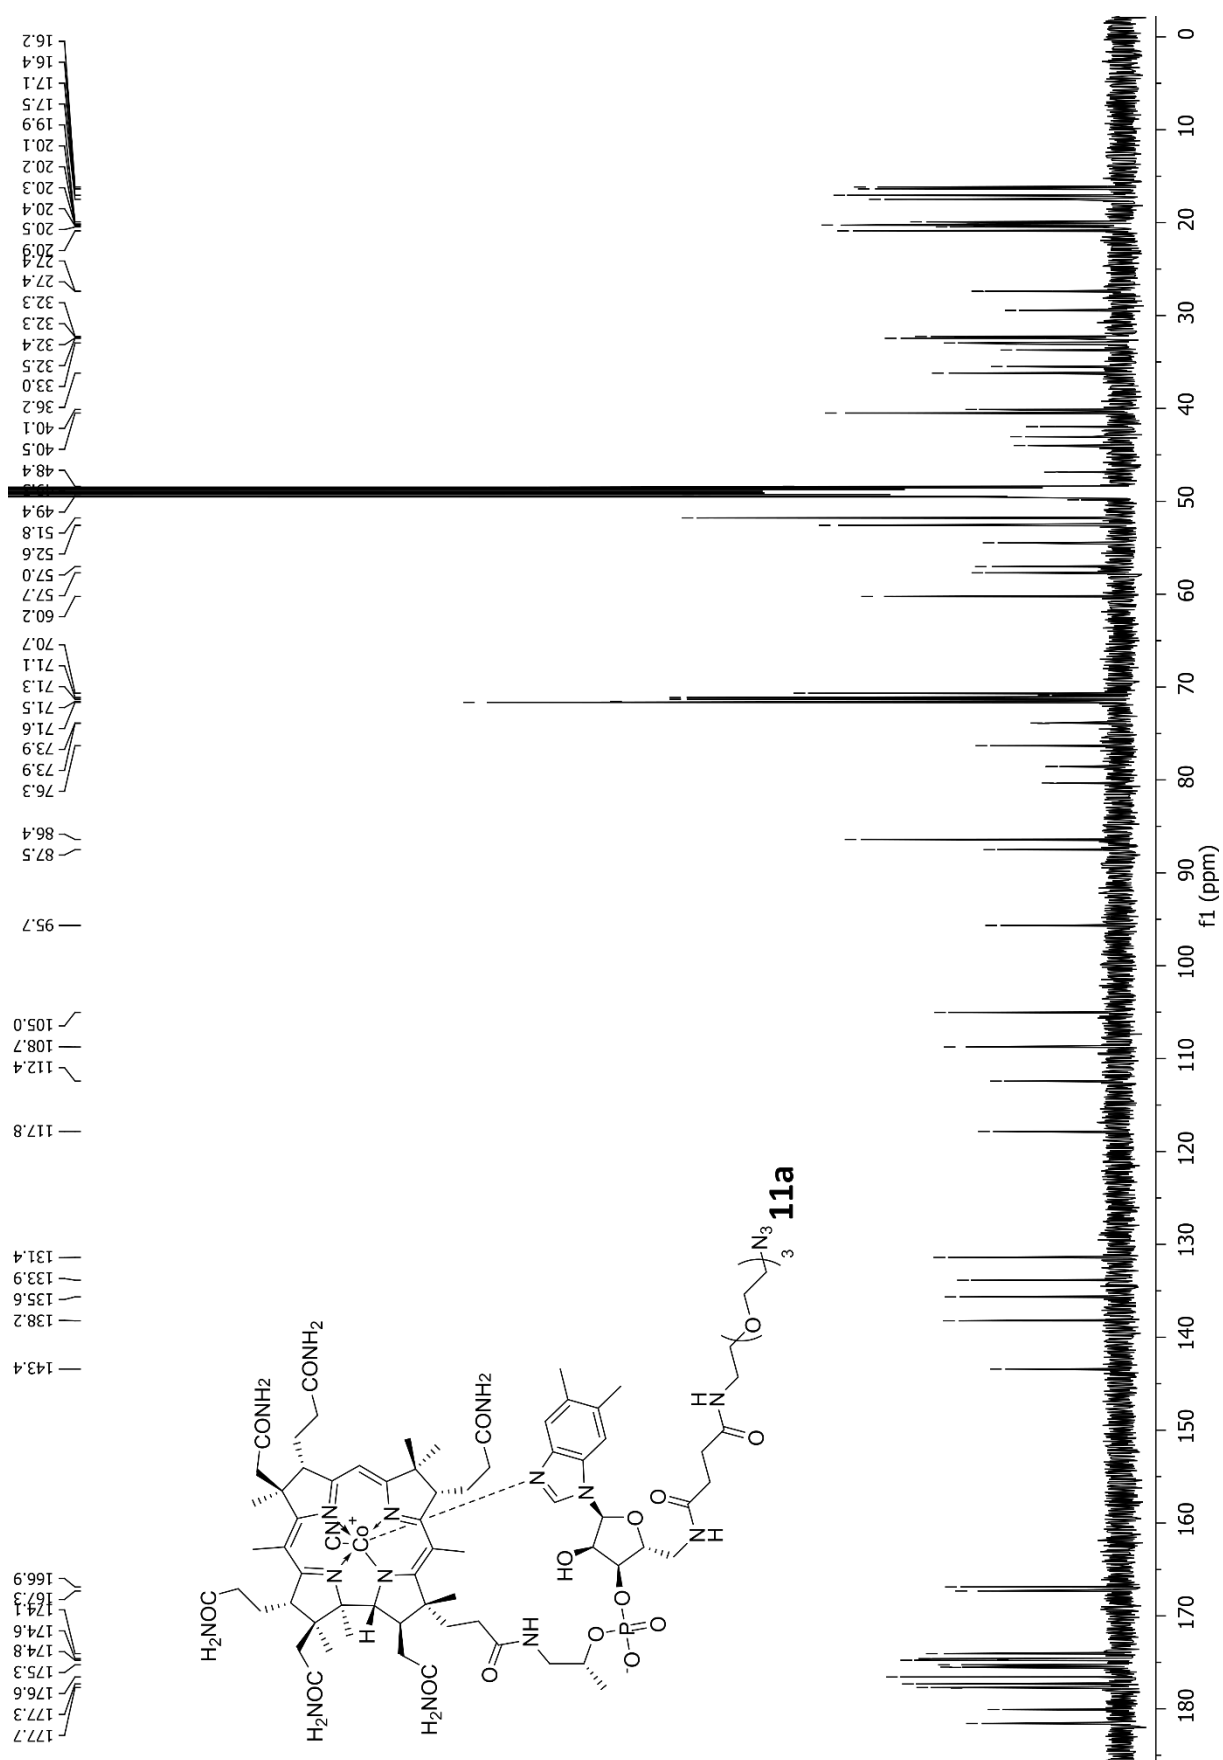

15.  $^1\text{H}$  NMR (500 MHz) and  $^{13}\text{C}$  NMR (126 MHz) of compound **11b** in  $\text{CD}_3\text{OD}$  (for clarity only well isolated signals are integrated)

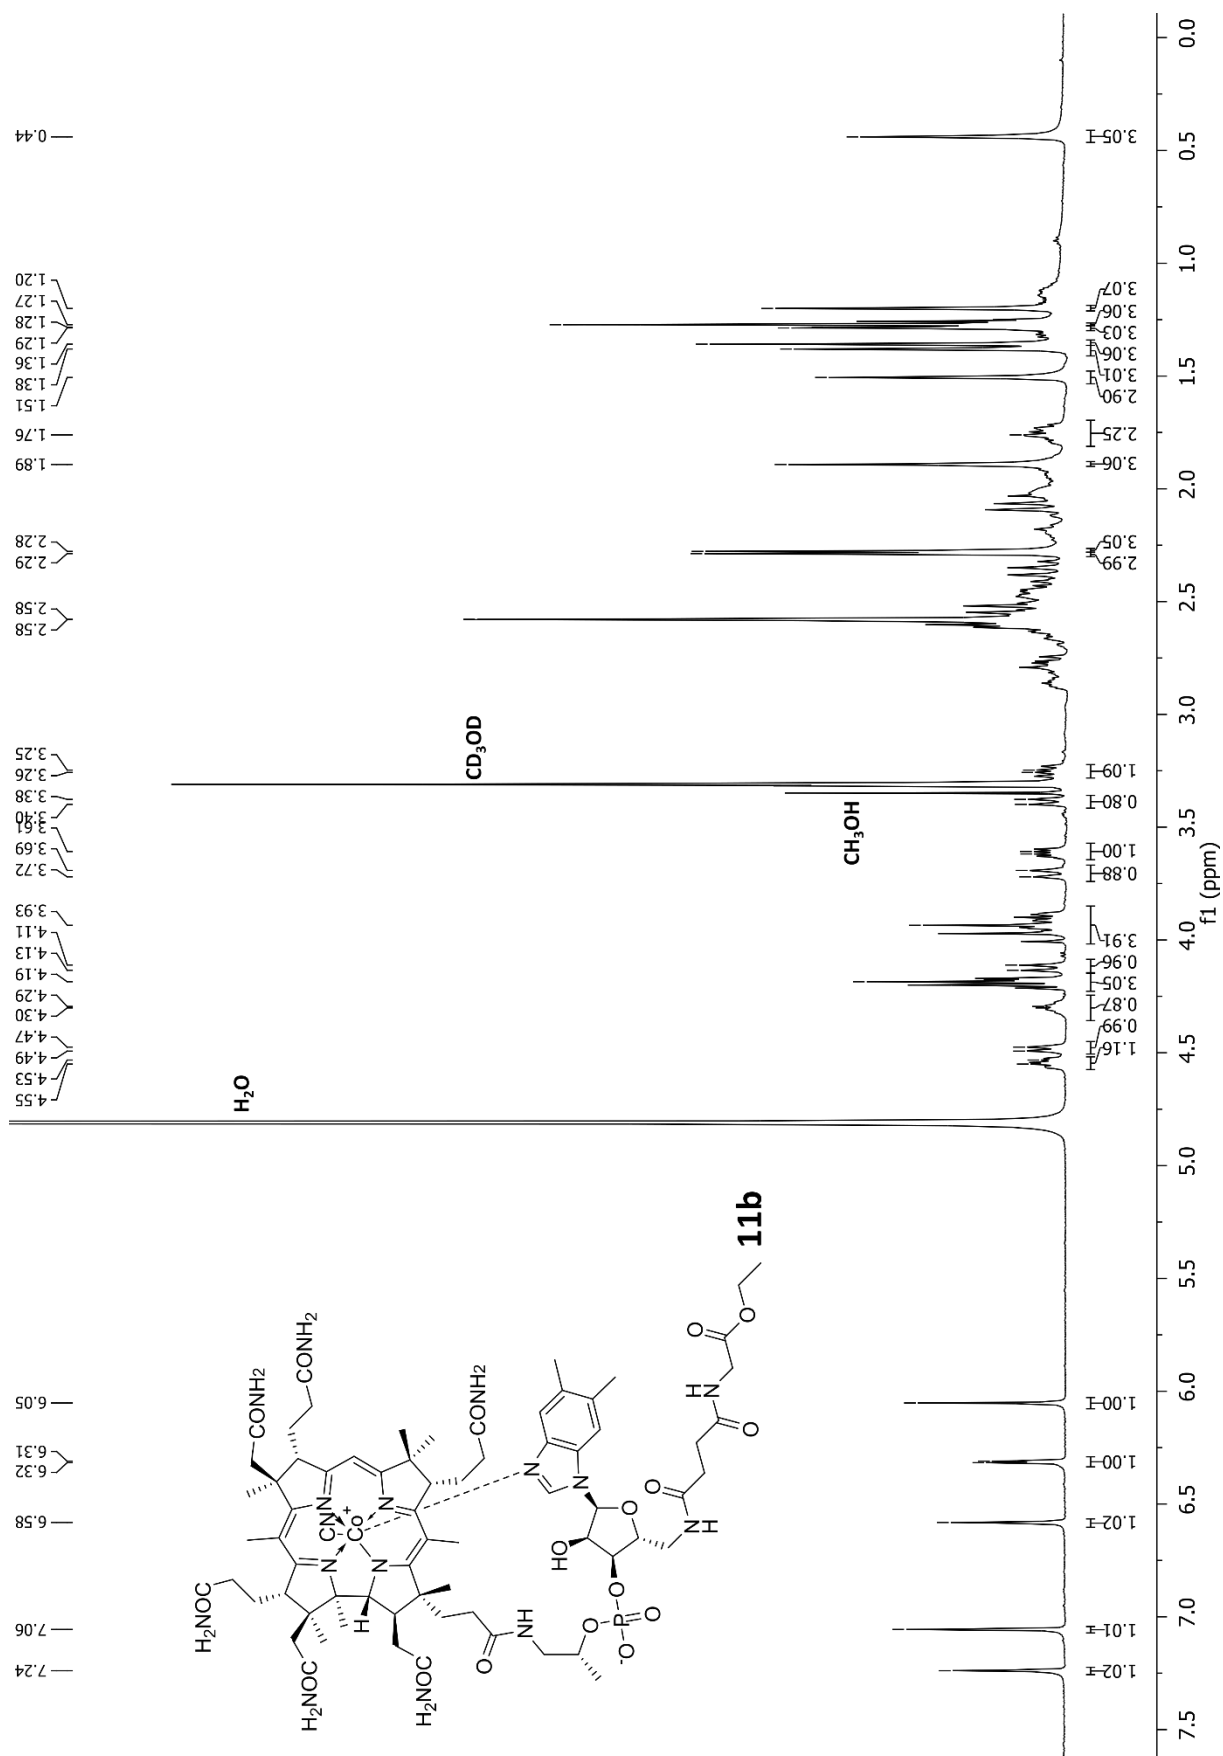

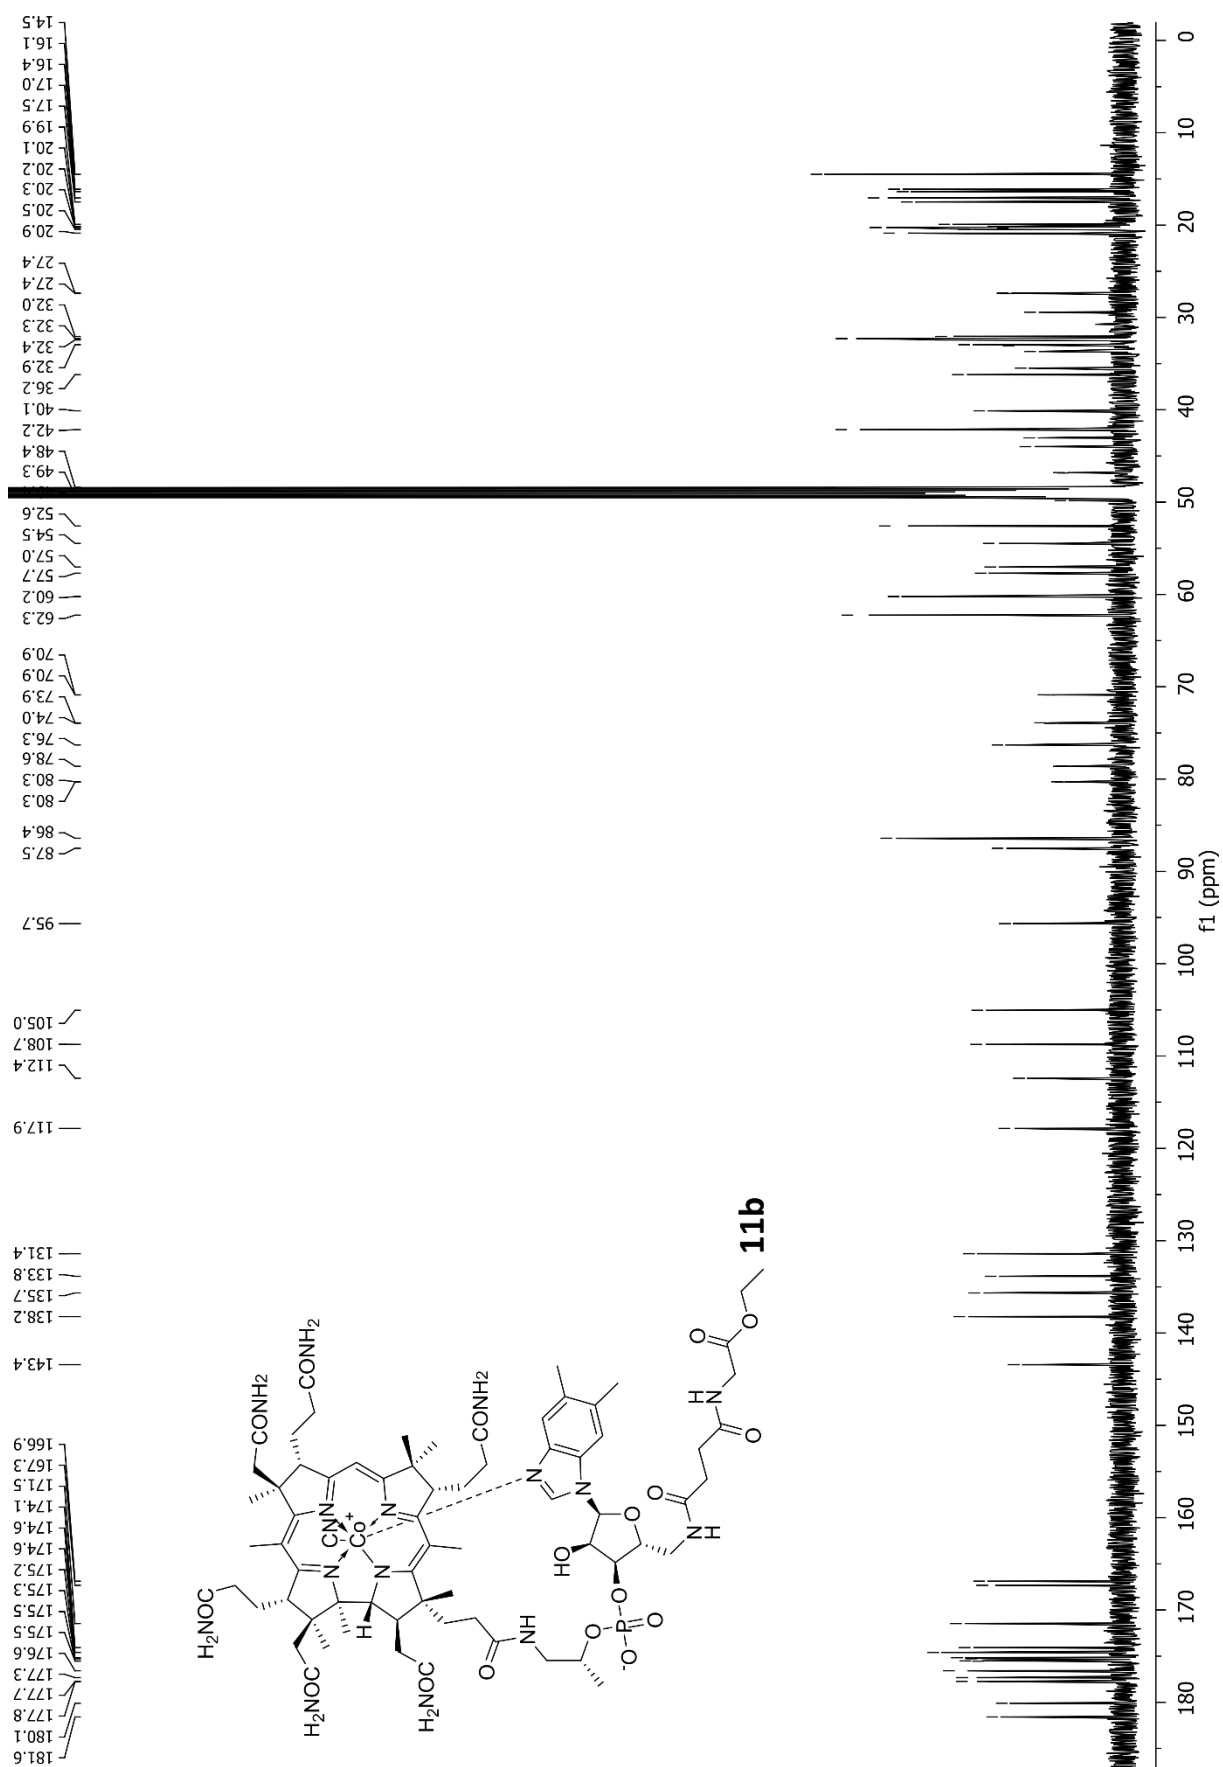

16.  $^1\text{H}$  NMR (500 MHz) and  $^{13}\text{C}$  NMR (126 MHz) of compound **11c** in  $\text{CD}_3\text{OD}$  (for clarity only well isolated signals are integrated)

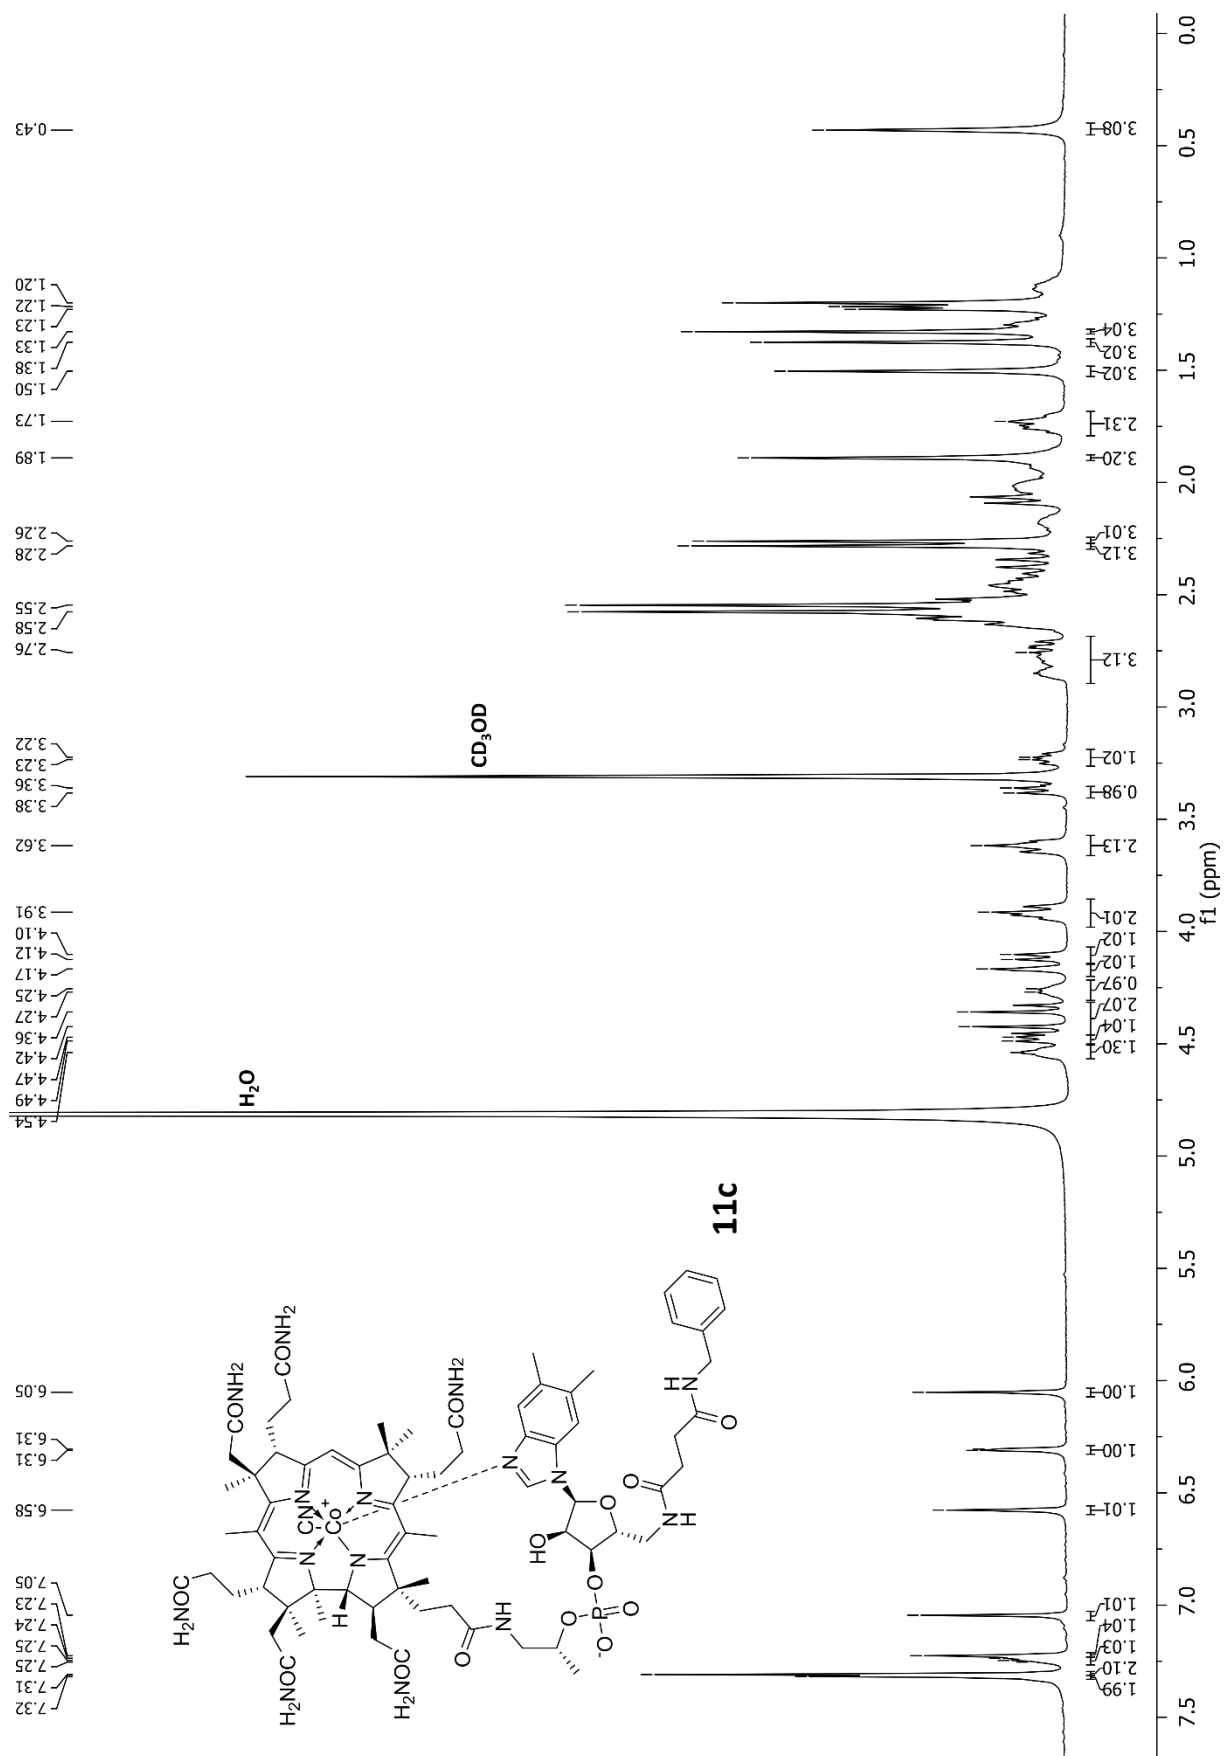

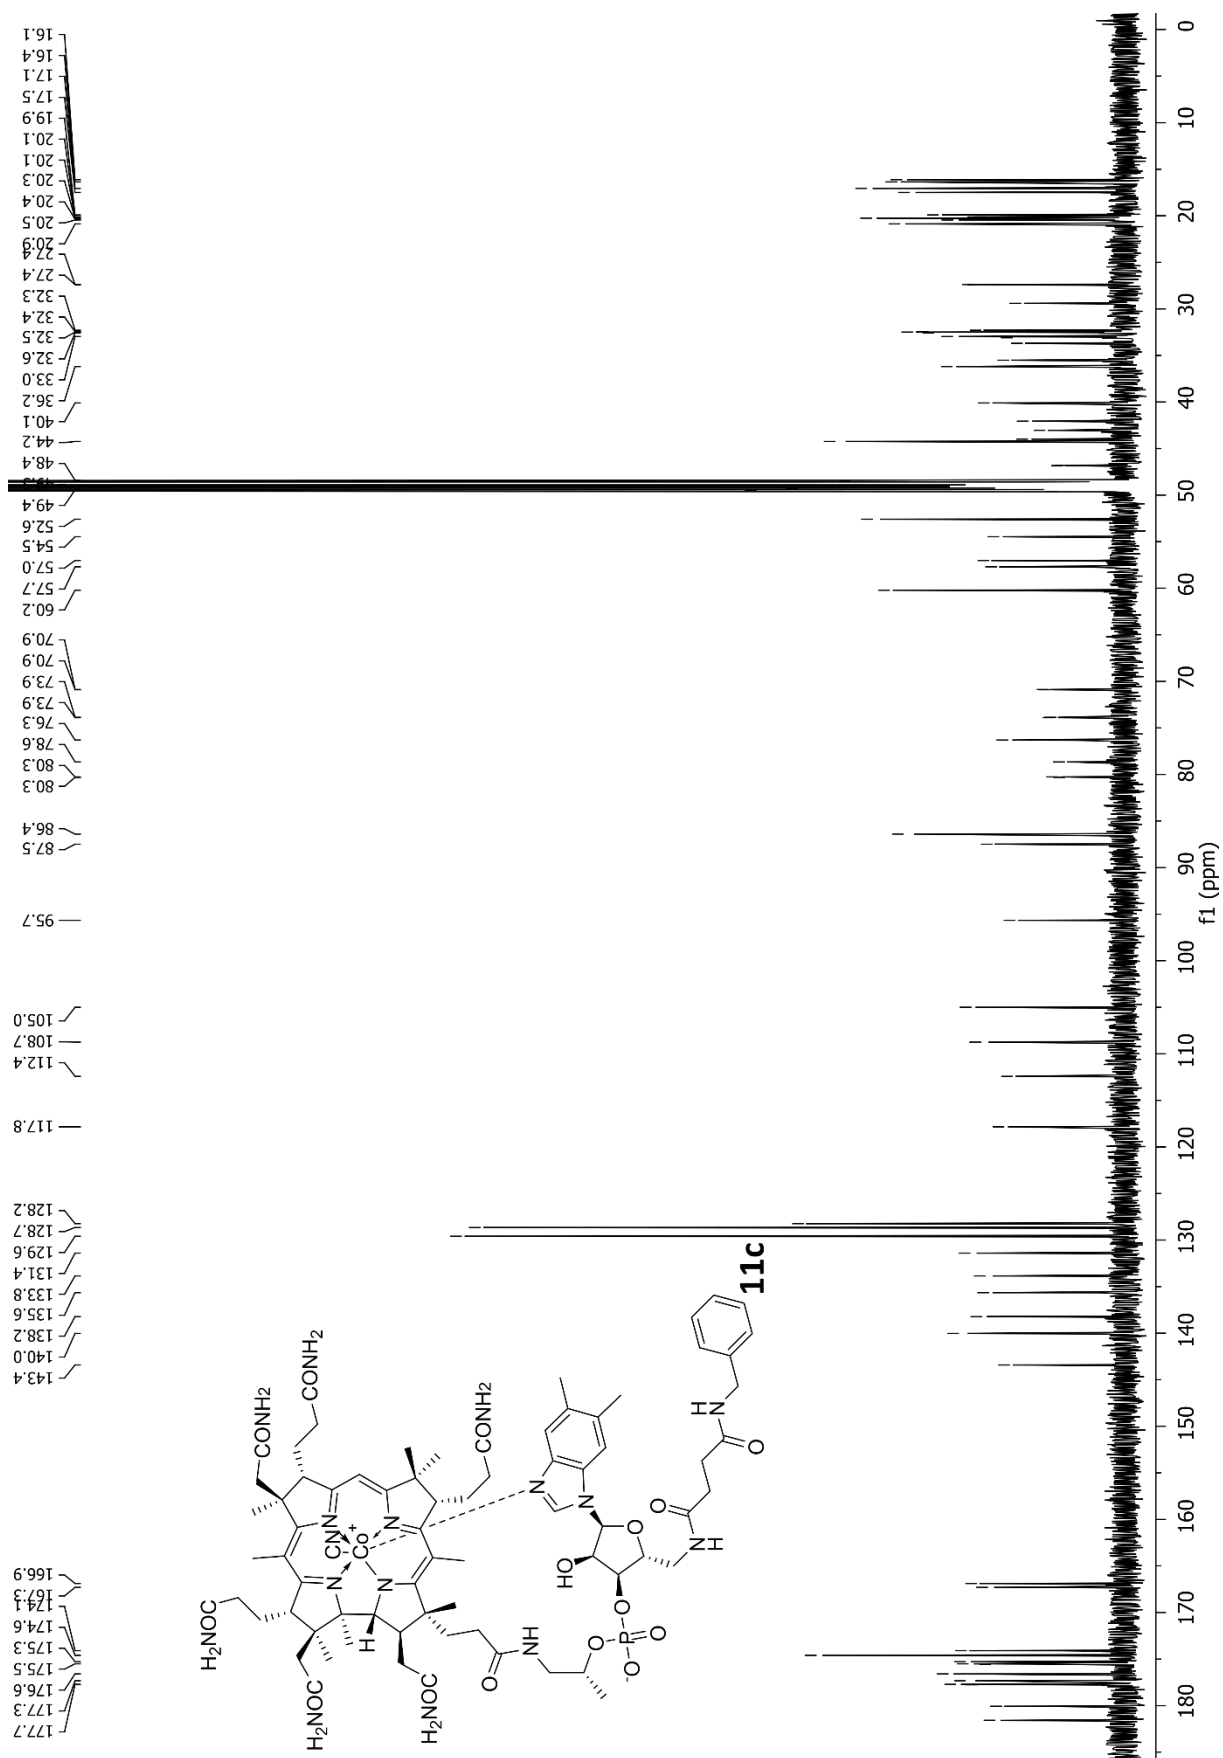

Supplement: c7ob02898a1.pdf [file c7ob02898a1.pdf]
